# Supplementary material for: Heavy silylchalcogenido lanthanates synthesis Ph4P[Cp3La–ESiMe3] (E = S, Se, and Te) via fluoride-induced demethylation of dimethylcarbonate to Ph4P[OCO2Me] key intermediate
Source: Royal Society of Chemistry journal article supplement (doi:10.1039/d1dt02000e), 2021-01-01
Supplement: d1dt02000e1.pdf [file d1dt02000e1.pdf]

# Heavy Silylchalcogenido Lanthanates $\text{Ph}_4\text{P}[\text{Cp}_3\text{La-ESiMe}_3]$ (E = S, Se, Te) via Fluoride-Induced Demethylation of Dimethylcarbonate to $\text{Ph}_4\text{P}[\text{OCO}_2\text{Me}]$ Key Intermediate

Jannick Guschlbauer, Tobias Vollgraff, Xiulan Xie, Ahmed Fetoh, Jörg Sundermeyer\*

## *Supporting Information*

### Content

|                                                                                                           |    |
|-----------------------------------------------------------------------------------------------------------|----|
| 1. Additional experiments .....                                                                           | 2  |
| Synthesis of $\text{PPNMe}_2[\text{OCO}_2\text{Me}]$ ( <b>2-PPNNMe<sub>2</sub></b> ) .....                | 2  |
| Synthesis of $\text{PPN}[\text{OCO}_2\text{Me}] \cdot 0.5 \text{ MeCN}$ ( <b>2-PPN · 0.5 MeCN</b> ) ..... | 3  |
| Synthesis of $\text{TBA}[\text{OCO}_2\text{Me}]$ ( <b>2-TBA</b> ) .....                                   | 3  |
| 2. NMR-Spectra.....                                                                                       | 4  |
| $\text{Ph}_4\text{P}[\text{F}]$ ( <b>1</b> ).....                                                         | 4  |
| $\text{Ph}_4\text{P}[\text{OCO}_2\text{Me}]$ ( <b>2</b> ).....                                            | 6  |
| $\text{PPN}[\text{OCO}_2\text{Me}] \cdot 0.5 \text{ MeCN}$ ( <b>2-PPN</b> ) .....                         | 7  |
| $\text{PPNMe}_2[\text{OCO}_2\text{Me}]$ ( <b>2-PPNMe<sub>2</sub></b> ).....                               | 8  |
| $\text{TBA}[\text{OCO}_2\text{Me}]$ ( <b>2-TBA</b> ) .....                                                | 9  |
| $\text{Ph}_4\text{P}[\text{SSiMe}_3]$ ( <b>3-S</b> ) .....                                                | 10 |
| $\text{Ph}_4\text{P}[\text{SeSiMe}_3]$ ( <b>3-Se</b> ).....                                               | 11 |
| $\text{Ph}_4\text{P}[\text{TeSiMe}_3]$ ( <b>3-Te</b> ) .....                                              | 13 |
| $\text{Ph}_4\text{P}[\text{Cp}_3\text{LaSSiMe}_3]$ ( <b>4-S</b> ) .....                                   | 15 |
| $\text{Ph}_4\text{P}[\text{Cp}_3\text{LaSeSiMe}_3]$ ( <b>4-Se</b> ).....                                  | 17 |
| $\text{Ph}_4\text{P}[\text{Cp}_3\text{LaTeSiMe}_3]$ ( <b>4-Te</b> ).....                                  | 19 |
| 3. Crystallographic data.....                                                                             | 22 |
| XRD-Molecular Structures.....                                                                             | 25 |
| 4. Thermal Analysis Studies.....                                                                          | 29 |
| 5. References .....                                                                                       | 29 |

## 1. Additional experiments

As no suitable single crystals of **2** could be grown for XRD structure determination, we applied the reaction route to other organic fluoride salts (or ion pairs), like the PPN[F] (**2-PPN**), [Me<sub>3</sub>P=N=P(NMe<sub>2</sub>)<sub>3</sub>]F (**2-PPNMe<sub>2</sub>**) and TBA[F] · 3 H<sub>2</sub>O (**1-TBA**). In PPN[F] (**1-PPN**), the fluoride ion is known to be loosely coordinated to both phosphorous atoms.<sup>1</sup> [Me<sub>3</sub>P=N=P(NMe<sub>2</sub>)<sub>3</sub>]F and [PPN]F were prepared by a literature-known procedure reacting [Me<sub>3</sub>P=N=P(NMe<sub>2</sub>)<sub>3</sub>]BF<sub>4</sub><sup>2</sup> or [PPN]BF<sub>4</sub><sup>1</sup>, respectively, with KF (1.05 eq) in anhydrous MeOH.<sup>3</sup> The work-up was performed similar to the procedure for **1** described in the main text. Demethylation of Me<sub>2</sub>CO<sub>3</sub> can be performed analogously to yield the methylcarbonates **2-PPN**, **2-PPNMe<sub>2</sub>** and **2-TBA**.

Single crystals for XRD structure determination could be grown from a solution in acetonitrile and diethyl ether. **2-PPN** crystallizes in the monoclinic space group *P21/c* with eight ion pairs and four molecules of acetonitrile per unit cell (See crystallographic data chapter). Each anion is surrounded by four PPN cations or by PPN cation and one acetonitrile molecule, respectively. The H-bonds are reaching from 2.34 Å to 2.50 Å. Each oxygen atom of the methylcarbonate anions is bonded either to C-H acidic positions of the cation or of the solvent acetonitrile via H-bonds. Thereby each terminal oxygen atom acts as H-bond acceptor. There are no P...O interactions between methylcarbonate anion and cation. The distance C77-H77A...O1 of the interacting solvent acetonitrile is observed at 2.41 Å. CH-activation with methylcarbonate salts is commonly observed for imidazolium-cations.<sup>4</sup>

Single crystals for XRD structure determination could be grown from a solution in acetonitrile and diethyl ether. **2-PPNMe<sub>2</sub>** crystallizes in the triclinic space group *P $\bar{1}$*  with two ion pairs per unit cell (Figure 3). Each methylcarbonate anion is attached to four PPNMe<sub>2</sub> cations forming H-bonds to methyl group protons from 2.48 Å to 2.50 Å.

Despite our concerns with respect to a potentially limited hydrolytic stability of the methylcarbonate anion, we also successfully converted the most common organic fluoride salt as trihydrate TBA[F] · 3 H<sub>2</sub>O into TBA[OCO<sub>2</sub>Me] (**2-TBA**) by this method. This implies that the methylcarbonate anion is not very sensitive – even at 140 °C - towards minor amounts of H<sub>2</sub>O in large excess of MeOH. However, the in situ generation of TBA[F] in methanol from TBA[BF<sub>4</sub>] by the described method works as well, if rigorous exclusion of any water potentially hydrogen bridge bonded to the methylcarbonate anion must be avoided. Water is stronger binding and more difficult to be fully removed than methanol.

### *Synthesis of PPNMe<sub>2</sub>[OCO<sub>2</sub>Me] (2-PPNMe<sub>2</sub>)*

In a glass autoclave with 5mm thick glass and QVF high-pressure (25 bar) teflon valve [(Me<sub>2</sub>N)<sub>3</sub>P=N=P(NMe<sub>2</sub>)<sub>3</sub>]F (**1-PPNMe<sub>2</sub>**) (2.57 g, 0.007 mol, 1.00 eq.) was diluted with a mixture of Me<sub>2</sub>CO<sub>3</sub> (4 mL, 0.048 mol, 6.80 eq.) and MeOH (1 mL). The reaction mixture was stirred for 3 days at 140 °C. A large amount of **2-PPNMe<sub>2</sub>** was already crystalized in the autoclave and were filtered off. All volatiles were removed from filtrate in fine vacuum until a colorless residue is obtained. MeCN is added to this residue until a clear solution is obtained. To this solution diethyl ether is added slowly until the precipitation of product begins. The solution is stored at –30 °C for crystallization. The colorless needles

can be isolated by filtration, and the mother liquor can be collected for further crystallization steps. **2-PPNMe<sub>2</sub>** is obtained in a yield of 2.18 g (0.005 mol, 75%). <sup>1</sup>H-NMR (300.19 MHz, dms<sub>o</sub>-d<sub>6</sub>): δ = 3.19 (s, 3H, [OCO<sub>2</sub>CH<sub>3</sub>]<sup>-</sup>), 2.63-2.59 (m, 36H, NMe<sub>2</sub>) ppm. <sup>13</sup>C-NMR (75.48 MHz, dms<sub>o</sub>-d<sub>6</sub>): δ = 36.2 (m, 36C, NMe<sub>2</sub>), 50.8 (s, [OCO<sub>2</sub>CH<sub>3</sub>]<sup>-</sup>) ppm. **Elemental analysis** found (calcd.) (%) for C<sub>14</sub>H<sub>39</sub>N<sub>7</sub>O<sub>3</sub>P<sub>2</sub> (415.5 g mol<sup>-1</sup>): 40.5 (40.5), 9.4 (9.5).

#### *Synthesis of PPN[OCO<sub>2</sub>Me] · 0.5 MeCN (2-PPN · 0.5 MeCN)*

The synthesis was performed analogously to the preparation of **2** using PPN[F] (9.36 g, 16.8 mmol, 1.0 eq.), Me<sub>2</sub>CO<sub>3</sub> (20 mL, 0.24 mol, 14.3 eq.), and MeOH (5 mL) and stirring the reaction mixture for 5 days at 140°C. **2-PPN · 0.5 MeCN** is obtained with a yield of 7.19 g (11.3 mmol, 67%). <sup>1</sup>H-NMR (300.13 MHz, dms<sub>o</sub>-d<sub>6</sub>): δ = 7.71-7.51 (m, 30H, [N(PPH<sub>3</sub>)<sub>2</sub>]<sup>+</sup>), 3.15 (s, 3H, [OCO<sub>2</sub>CH<sub>3</sub>]<sup>-</sup>), 2.07 (s, 1.5H, 0.5 x H<sub>3</sub>CCN) ppm. <sup>13</sup>C-NMR (75.48 MHz, dms<sub>o</sub>-d<sub>6</sub>): δ = 155.4 (s, [OCO<sub>2</sub>CH<sub>3</sub>]<sup>-</sup>), 133.6 (s\*) & 131.9 (m\*) & 129.5 (m\*) & 126.8 (dd, <sup>1</sup>J<sub>CP</sub> = 107.6 Hz, <sup>2</sup>J<sub>CN</sub> = 2.5 Hz) (signals for the PPN<sup>+</sup> cation), 118.0 (s\*, H<sub>3</sub>CCN), 50.7 (s, [OCO<sub>2</sub>CH<sub>3</sub>]<sup>-</sup>), 1.1 (s, H<sub>3</sub>CCN) ppm. \*The expected multiplet could not be resolved as the intensity of the corresponding signals is too low. **Elemental analysis** found (calcd.) (%) for C<sub>39</sub>H<sub>34.5</sub>N<sub>1.5</sub>O<sub>3</sub>P<sub>2</sub> (634.2 g mol<sup>-1</sup>): C 73.3 (73.9), H 5.5 (5.5), N 3.6 (3.3).

#### *Synthesis of TBA[OCO<sub>2</sub>Me] (2-TBA)*

The synthesis of **2-TBA** was performed analogously to the preparation of **2**, using TBAF · 3 H<sub>2</sub>O (3.10 g, 9.83 mmol, 1.0 eq.), Me<sub>2</sub>CO<sub>3</sub> (9 mL, 0.11 mol, 11.2 eq.), and MeOH (5 mL) and stirring the reaction mixture for 3 days at 140°C. **2-TBA** is obtained with a yield of 2.30 g (7.24 mmol, 74%). <sup>1</sup>H-NMR (300.13 MHz, dms<sub>o</sub>-d<sub>6</sub>): δ = 3.18 (t, <sup>3</sup>J<sub>HH</sub> = 3.8 Hz, 8H\*, [N(CH<sub>2</sub>CH<sub>2</sub>CH<sub>2</sub>CH<sub>3</sub>)<sub>4</sub>]<sup>+</sup>), 3.15 (s, 3H\*, [OCO<sub>2</sub>CH<sub>3</sub>]<sup>-</sup>), 1.57 (pent., <sup>3</sup>J<sub>HH</sub> = 7.7 Hz, 8H [N(CH<sub>2</sub>CH<sub>2</sub>CH<sub>2</sub>CH<sub>3</sub>)<sub>4</sub>]<sup>+</sup>), 1.31 (sext., <sup>3</sup>J<sub>HH</sub> = 7.5 Hz, 8H [N(CH<sub>2</sub>CH<sub>2</sub>CH<sub>2</sub>CH<sub>3</sub>)<sub>4</sub>]<sup>+</sup>), 0.93 (t, <sup>3</sup>J<sub>HH</sub> = 7.4 Hz 12H) ppm. \*As the signals for the methylcarbonate anion and the *N*-attached methylene-groups coincide, only the sum of the integrals of these signals is accessible that equals 11. <sup>13</sup>C-NMR (75.48 MHz, dms<sub>o</sub>-d<sub>6</sub>): δ = 155.4 (s, [OCO<sub>2</sub>CH<sub>3</sub>]<sup>-</sup>), 57.5 (t, <sup>1</sup>J<sub>CN</sub> = 3.2 Hz, [N(CH<sub>2</sub>CH<sub>2</sub>CH<sub>2</sub>CH<sub>3</sub>)<sub>4</sub>]<sup>+</sup>), 50.7 (s, [OCO<sub>2</sub>CH<sub>3</sub>]<sup>-</sup>), 23.0 (s, [N(CH<sub>2</sub>CH<sub>2</sub>CH<sub>2</sub>CH<sub>3</sub>)<sub>4</sub>]<sup>+</sup>), 19.2 (s, [N(CH<sub>2</sub>CH<sub>2</sub>CH<sub>2</sub>CH<sub>3</sub>)<sub>4</sub>]<sup>+</sup>), 13.4 (s, [N(CH<sub>2</sub>CH<sub>2</sub>CH<sub>2</sub>CH<sub>3</sub>)<sub>4</sub>]<sup>+</sup>) ppm. **Elemental analysis** found (calcd.) (%) for C<sub>18</sub>H<sub>39</sub>NO<sub>3</sub> (317.51 g mol<sup>-1</sup>): C 68.2 (68.1), H 12.3 (12.4), N 4.6 (4.4). This method implies that the methylcarbonate anion is not sensitive towards minor amounts of H<sub>2</sub>O. However, the *in situ* generation of TBA[F] in methanol from TBA[BF<sub>4</sub>] by the described method works as well.

## 2. NMR-Spectra

*Ph*<sub>4</sub>PF (**1**)

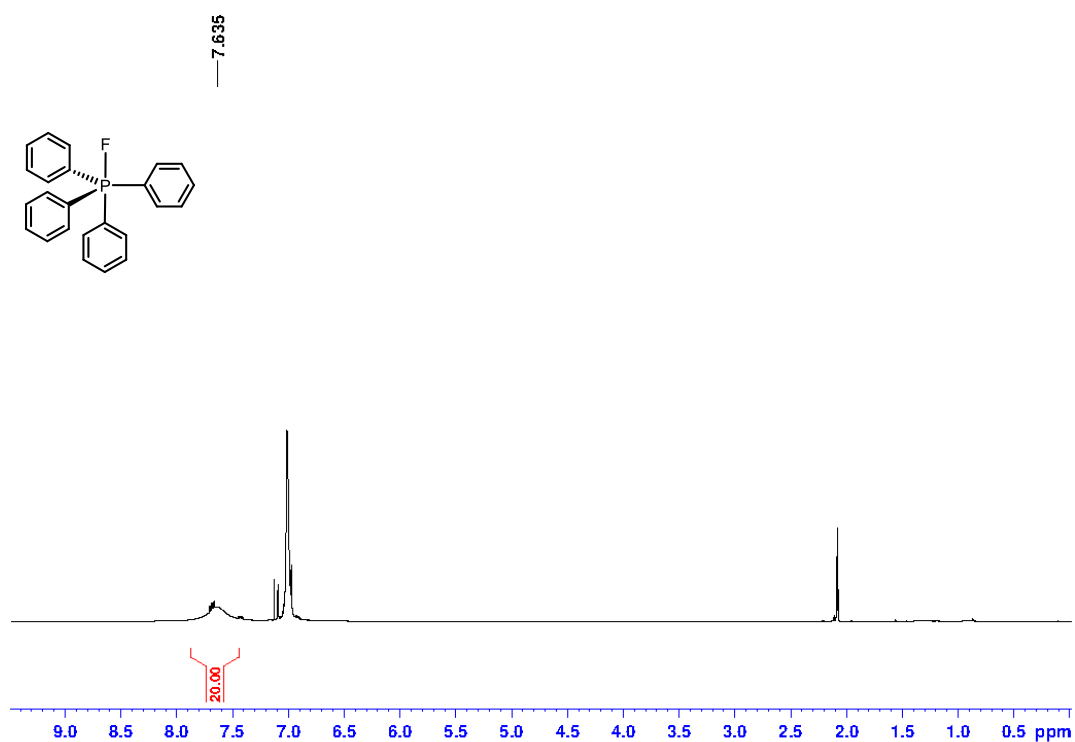

**Figure S1.** <sup>1</sup>H-NMR spectrum (300.1 MHz, toluene-d<sub>8</sub>) of PPh<sub>4</sub>F (**1**).

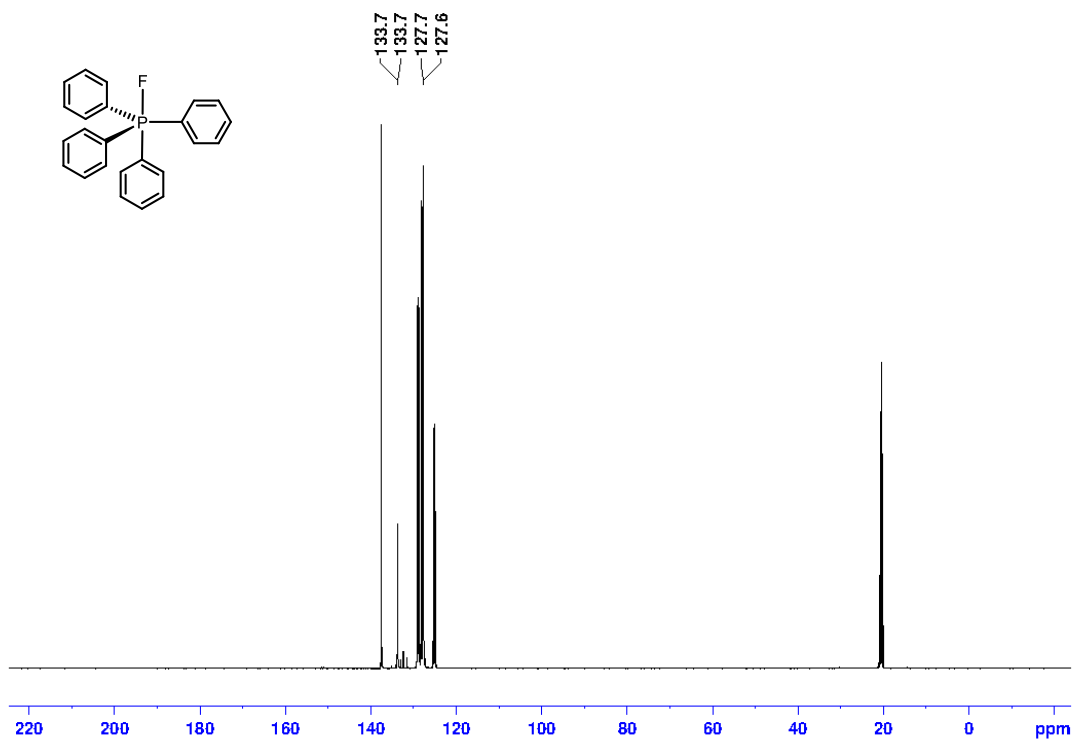

**Figure S2.** <sup>13</sup>C-NMR spectrum (75.5 MHz, toluene-d<sub>8</sub>) of PPh<sub>4</sub>F (**1**).

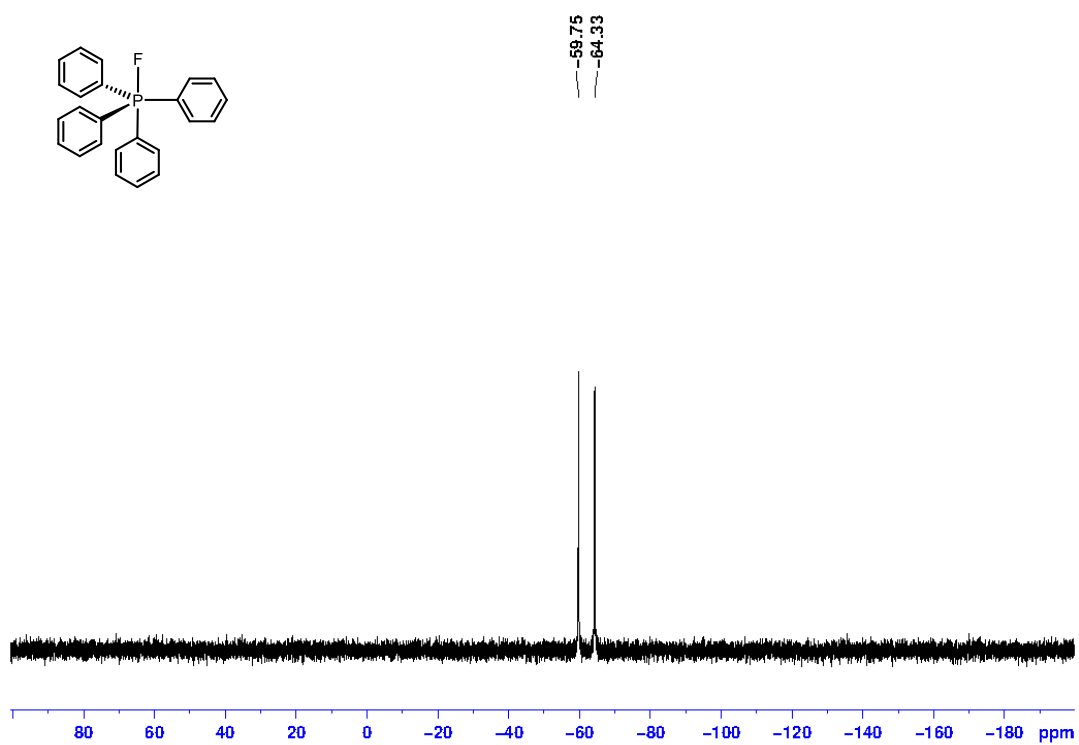

Figure S3. <sup>31</sup>P-NMR spectrum (122.5 MHz, toluene-d<sub>8</sub>) of PPh<sub>4</sub>F (1).

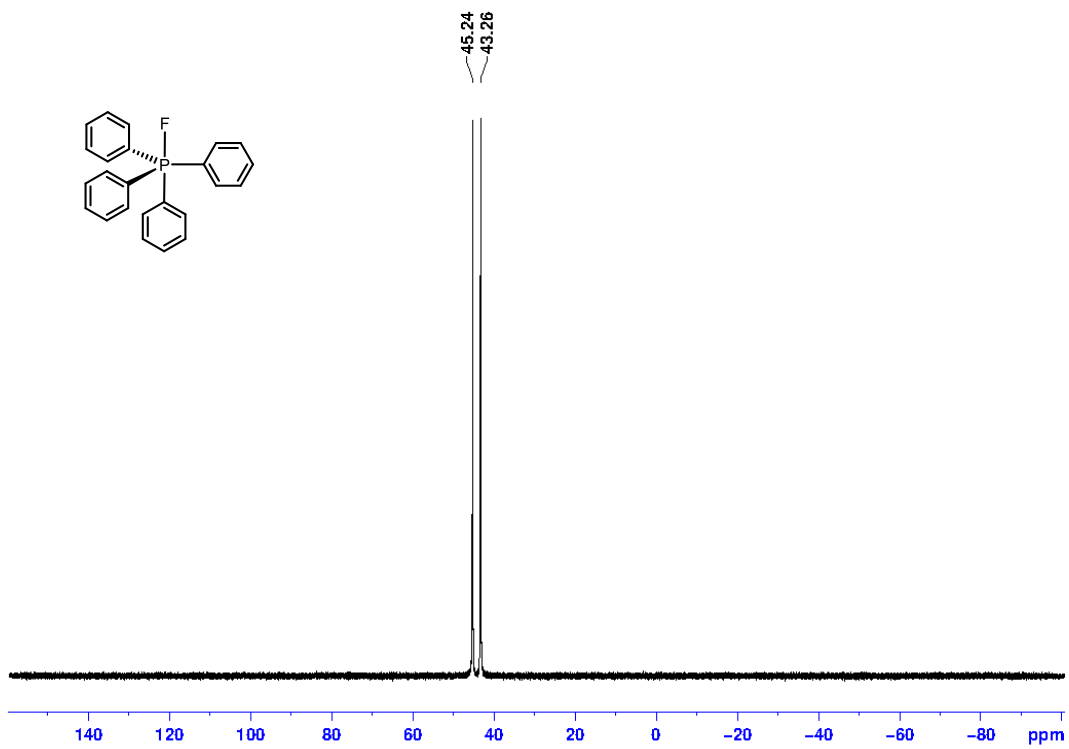

Figure S4. <sup>19</sup>F-NMR spectrum (282.5 MHz, toluene-d<sub>8</sub>) of PPh<sub>4</sub>F (1).

*Ph*<sub>4</sub>*P*[*OCO*<sub>2</sub>*Me*] (2)

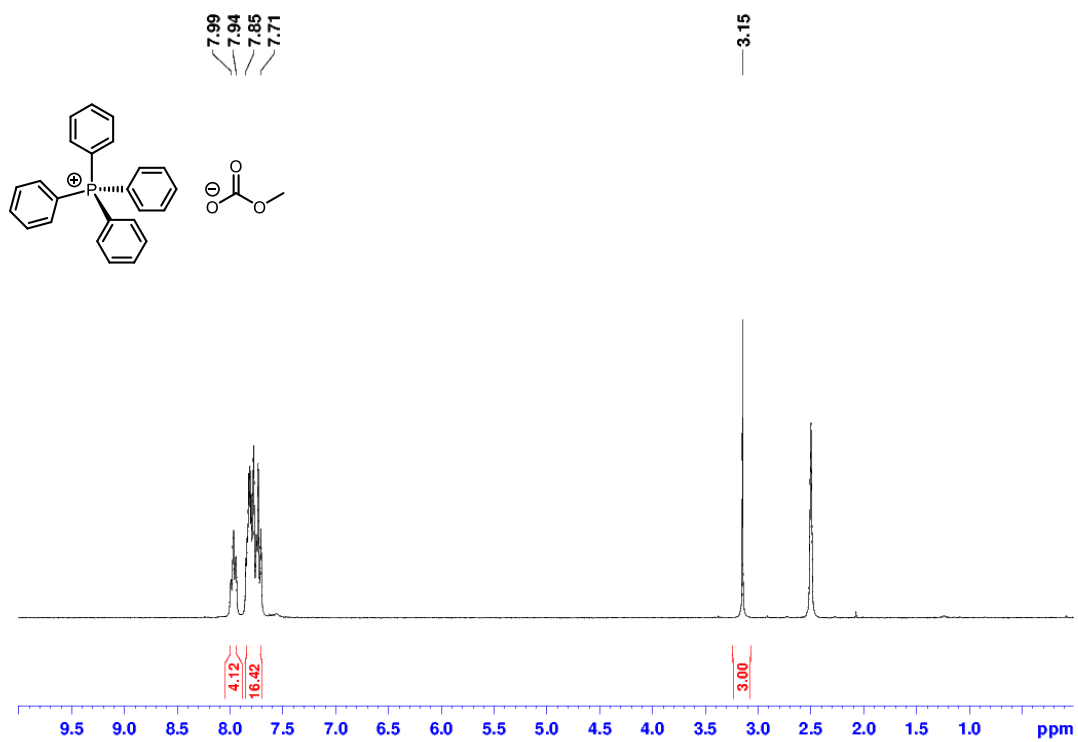

**Figure S5.** <sup>1</sup>H-NMR spectrum (300.1 MHz, dms0-d<sub>6</sub>) of PPh<sub>4</sub>[OCO<sub>2</sub>Me] (2).

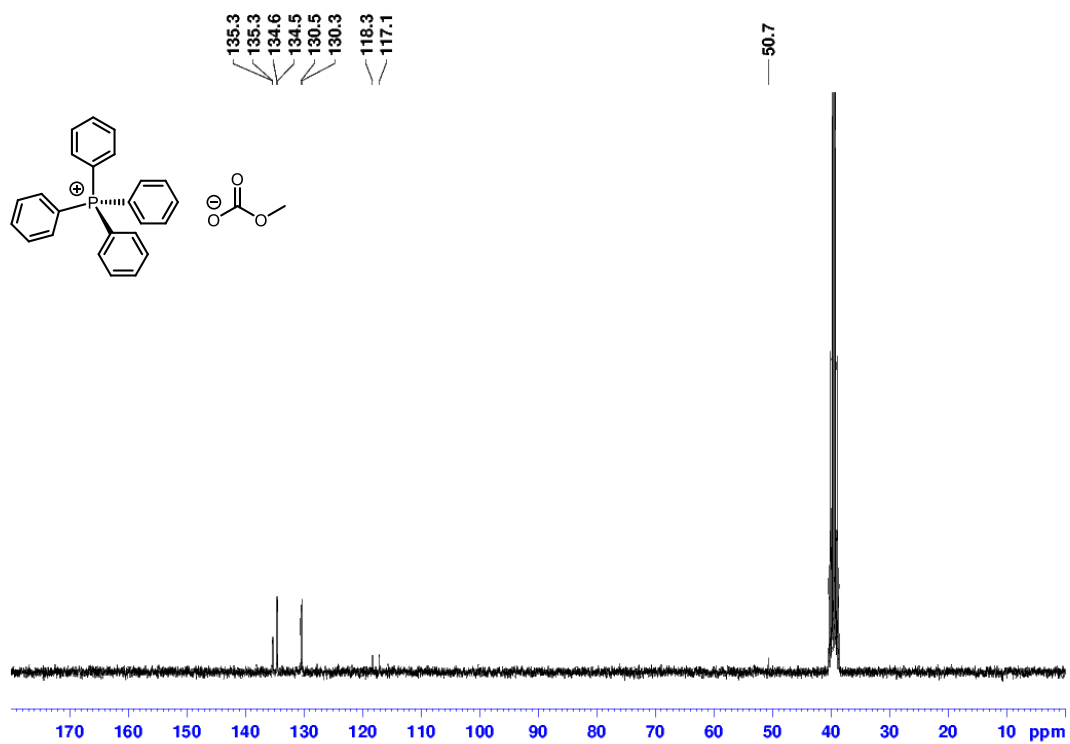

**Figure S6.** <sup>13</sup>C-NMR spectrum (75.5 MHz, dms0-d<sub>6</sub>) of PPh<sub>4</sub>[OCO<sub>2</sub>Me] (2).

*PPN[OCO<sub>2</sub>Me] · 0.5 MeCN (2-PPN)*

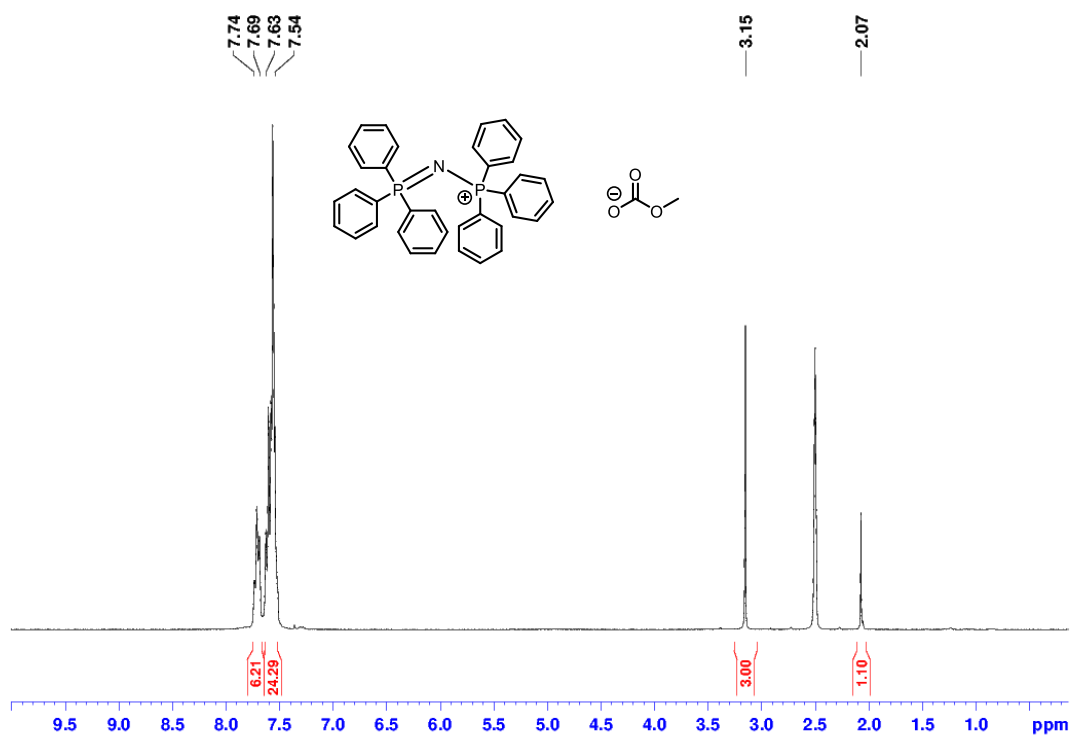

**Figure S7.** <sup>1</sup>H-NMR spectrum (300.1 MHz, dms0-d<sub>6</sub>) of PPN[OCO<sub>2</sub>Me] (2-PPN).

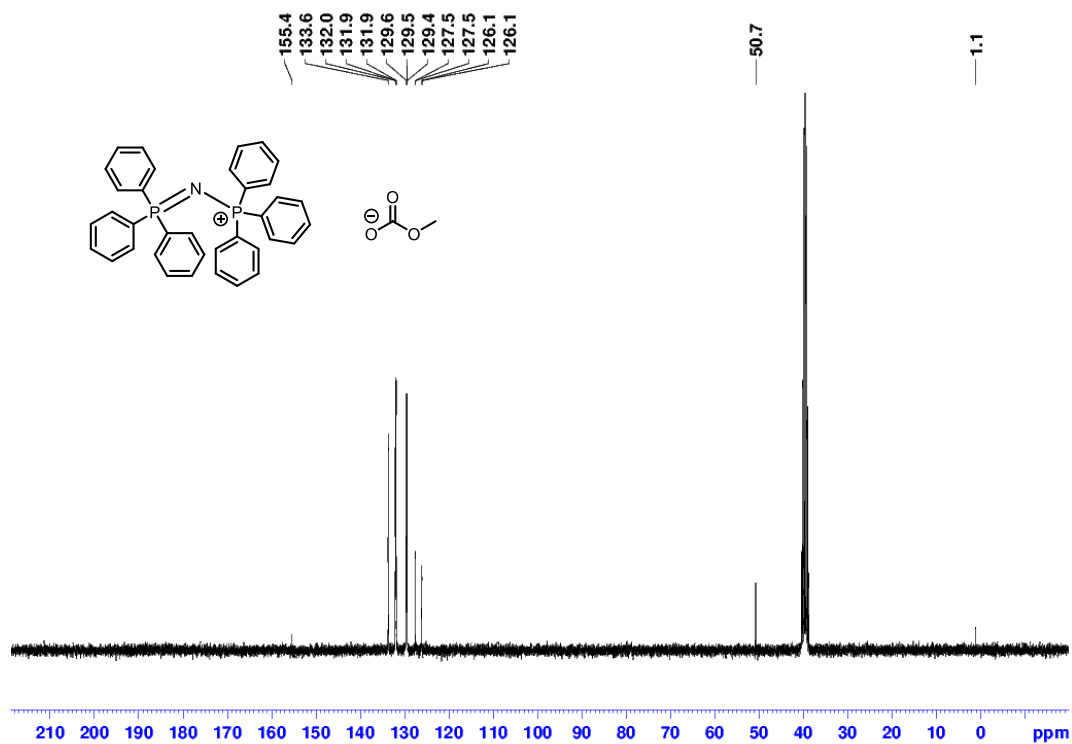

**Figure S8.** <sup>13</sup>C-NMR spectrum (75.5 MHz, dms0-d<sub>6</sub>) of PPN[OCO<sub>2</sub>Me] (2-PPN).

*PPNMe<sub>2</sub>[OCO<sub>2</sub>Me](2-PPNMe<sub>2</sub>)*

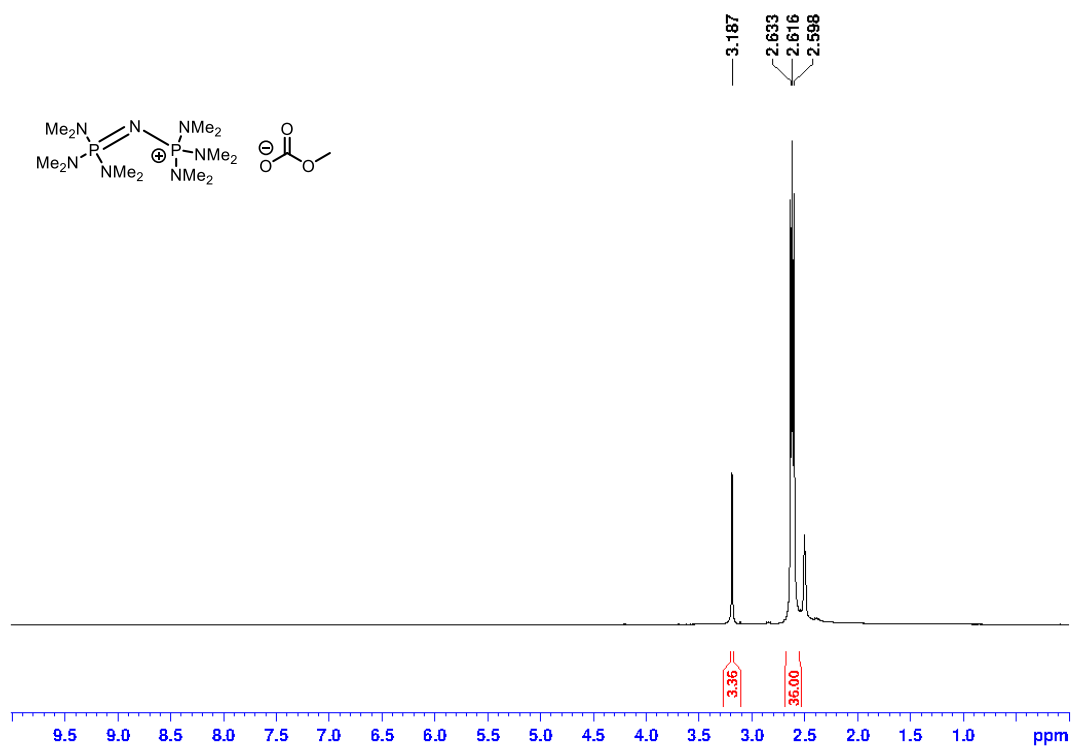

**Figure S9.** <sup>1</sup>H-NMR spectrum (300.1 MHz, dms0-d<sub>6</sub>) of PPNMe<sub>2</sub>[OCO<sub>2</sub>Me] (2-PPNMe<sub>2</sub>).

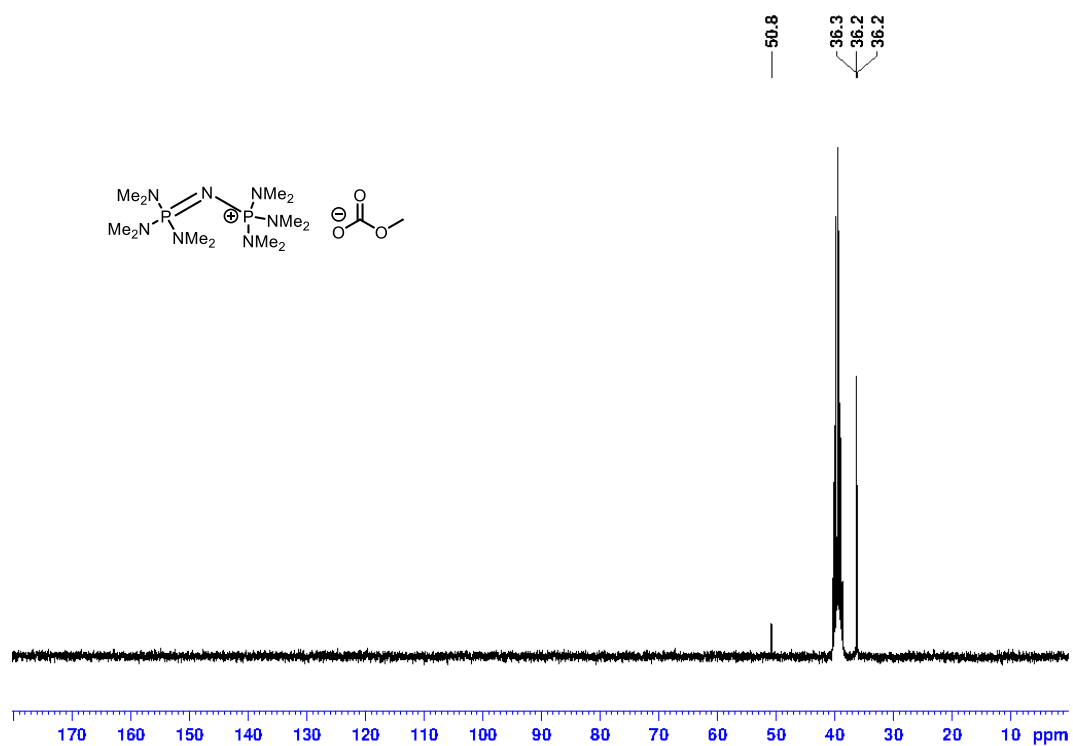

**Figure S10.** <sup>13</sup>C-NMR spectrum (75.5 MHz, dms0-d<sub>6</sub>) of PPNMe<sub>2</sub>[OCO<sub>2</sub>Me] (2-PPNMe<sub>2</sub>).



*TBA*[*OCO*<sub>2</sub>*Me*] (**2-TBA**)

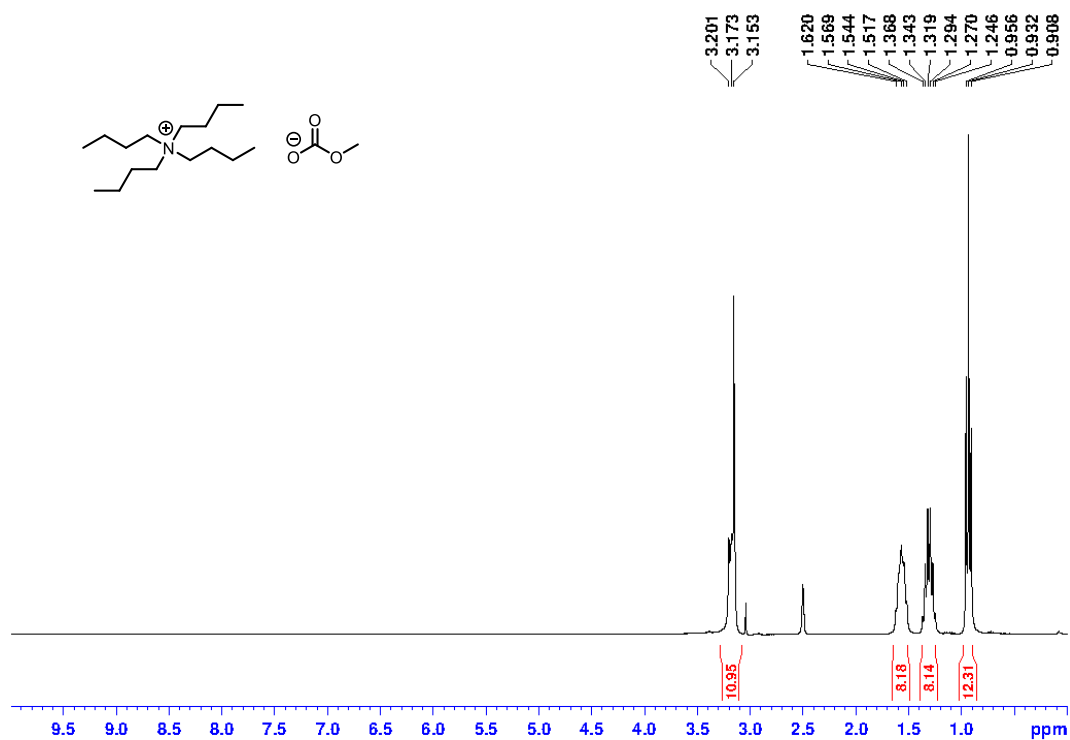

**Figure S11.** <sup>1</sup>H-NMR spectrum (300.1 MHz, *dmsd*<sub>6</sub>) of *NBu*<sub>4</sub>[*OCO*<sub>2</sub>*Me*] (**2-TBA**). Signals for the methylcarbonate anion and the N-attached methylene-groups coincide. The sum of the integrals of these signals equals the expected amount of 11.

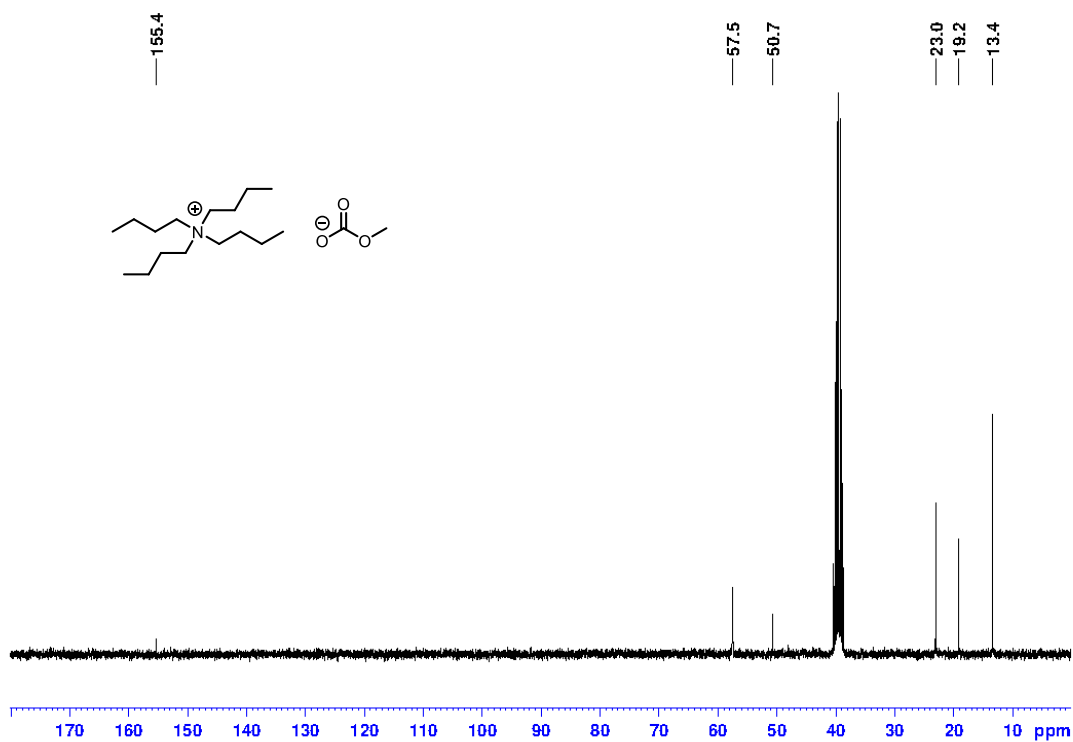

**Figure S12.** <sup>13</sup>C-NMR spectrum (75.5 MHz, *dmsd*<sub>6</sub>) of *NBu*<sub>4</sub>[*OCO*<sub>2</sub>*Me*] (**2-TBA**).

*Ph*<sub>4</sub>P[SSiMe<sub>3</sub>] (**3-S**)

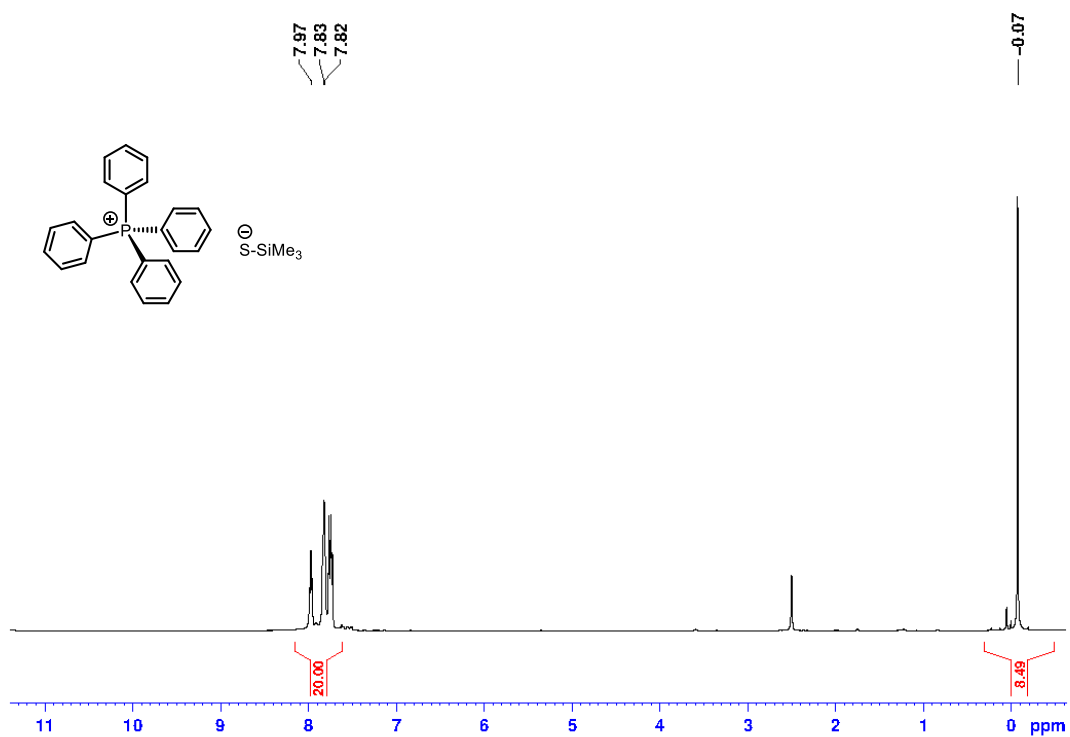

**Figure S13.** <sup>1</sup>H-NMR spectrum (300.1 MHz, dms<sub>o</sub>-d<sub>6</sub>) of PPh<sub>4</sub>[SSiMe<sub>3</sub>] (**3-S**).

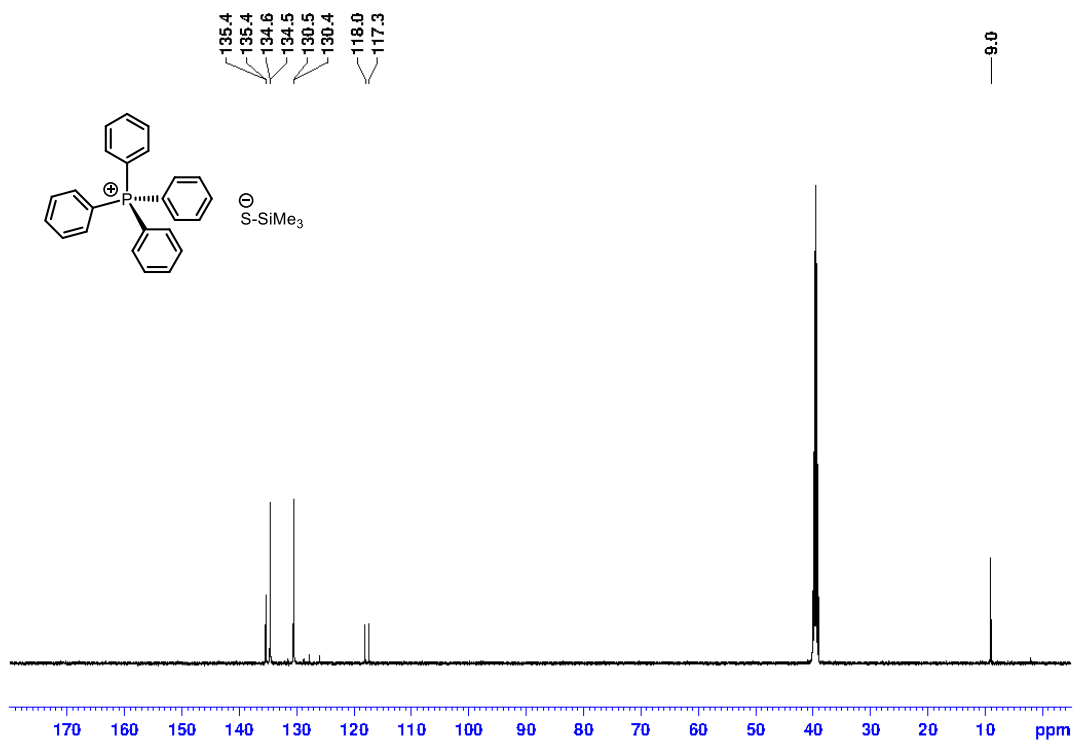

**Figure S14.** <sup>13</sup>C-NMR spectrum (75.5 MHz, dms<sub>o</sub>-d<sub>6</sub>) of PPh<sub>4</sub>[SSiMe<sub>3</sub>] (**3-S**).

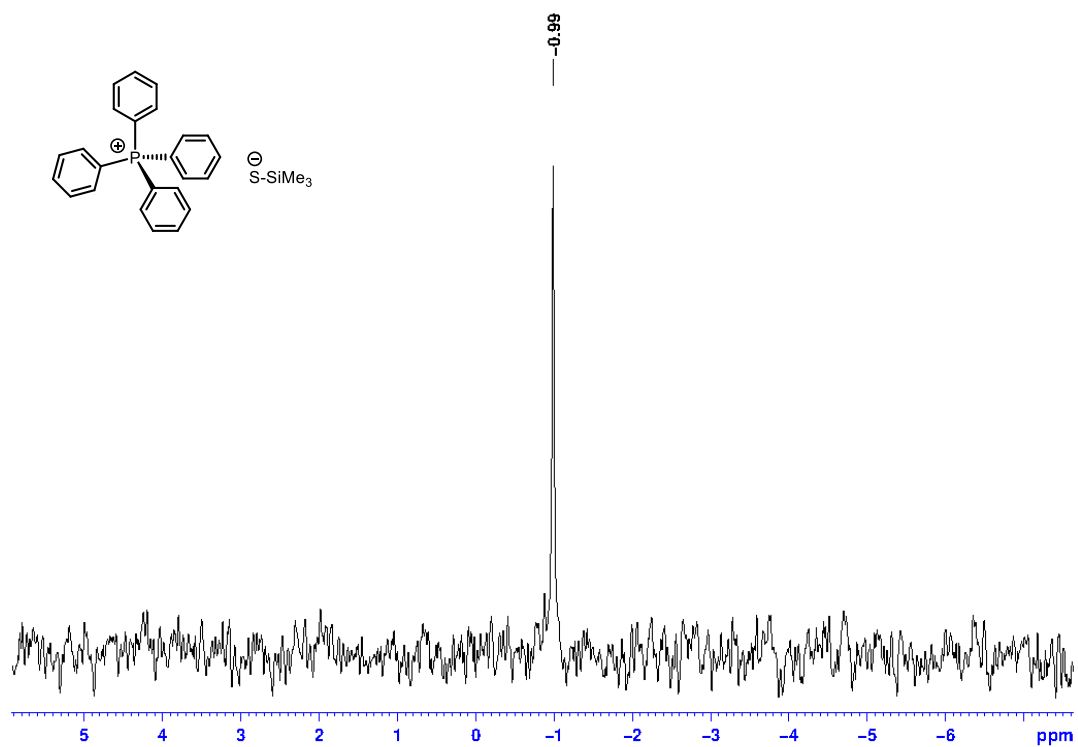

**Figure 15.**  $^{29}\text{Si}$ -NMR spectrum (59.65 MHz,  $\text{dms}\text{-d}_6$ ) of  $\text{PPh}_4[\text{SSiMe}_3]$  (3-S).

*$\text{Ph}_4\text{P}[\text{SeSiMe}_3]$  (3-Se)*

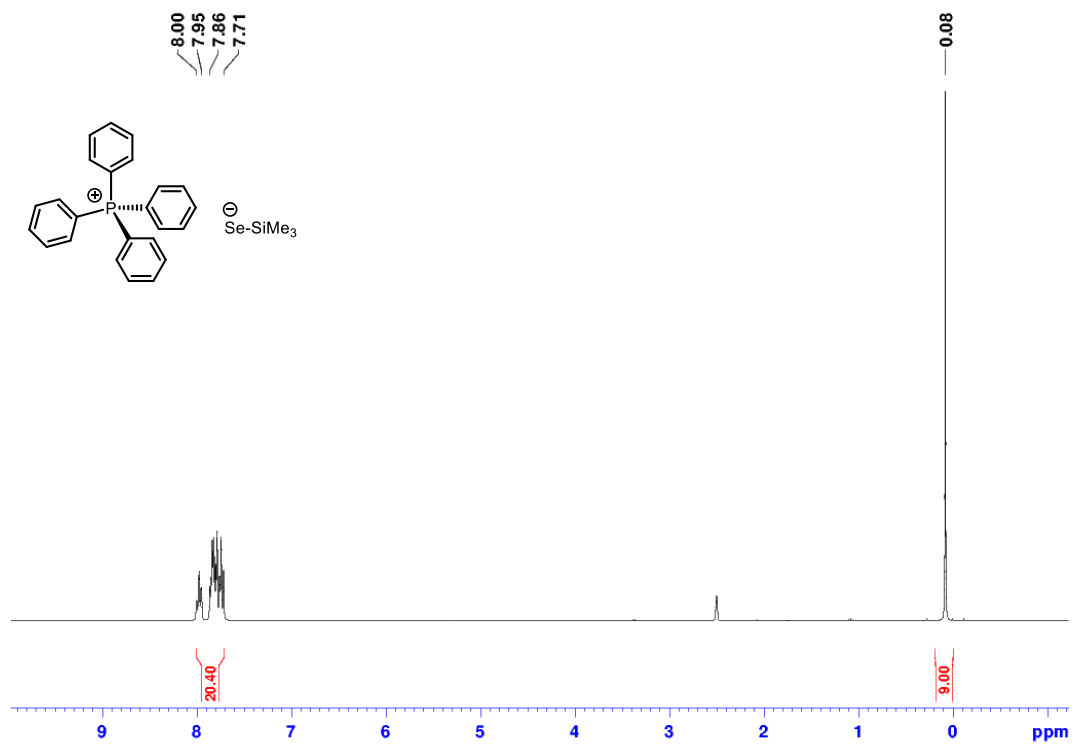

**Figure S16.**  $^1\text{H}$ -NMR spectrum (300.1 MHz,  $\text{dms}\text{-d}_6$ ) of  $\text{PPh}_4[\text{SeSiMe}_3]$  (3-Se).

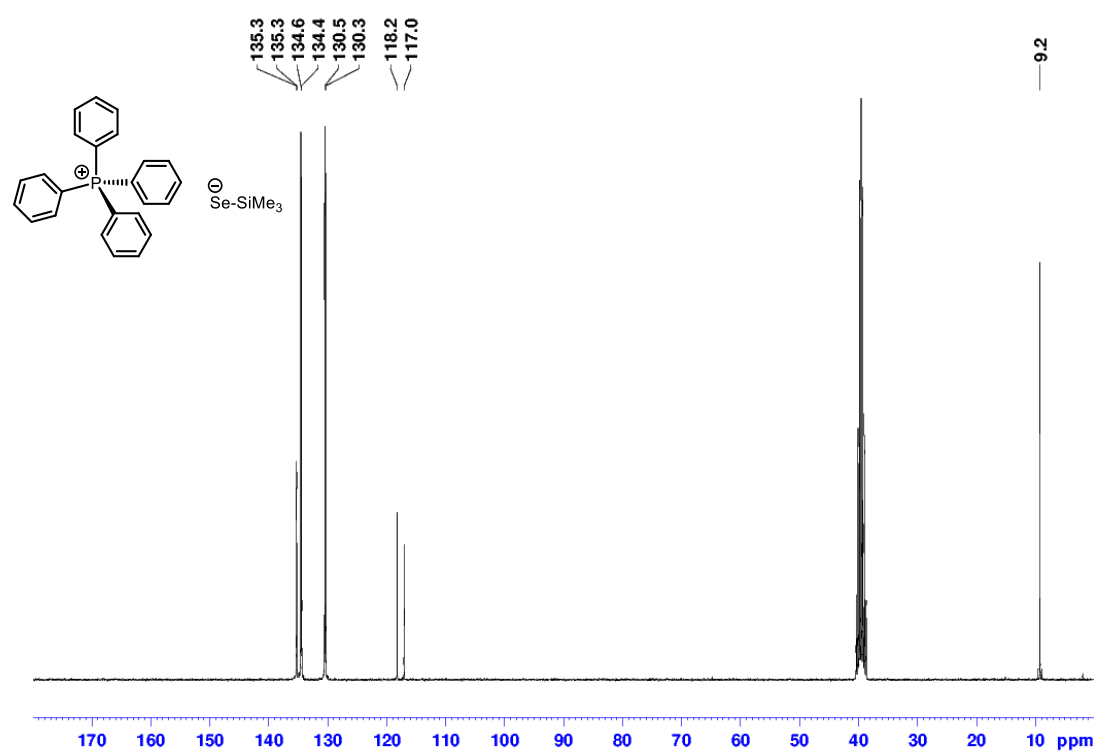

Figure S17.  $^{13}\text{C}$ -NMR spectrum (75.5 MHz,  $\text{dms0-d}_6$ ) of  $\text{PPh}_4[\text{SeSiMe}_3]$  (**3-Se**).

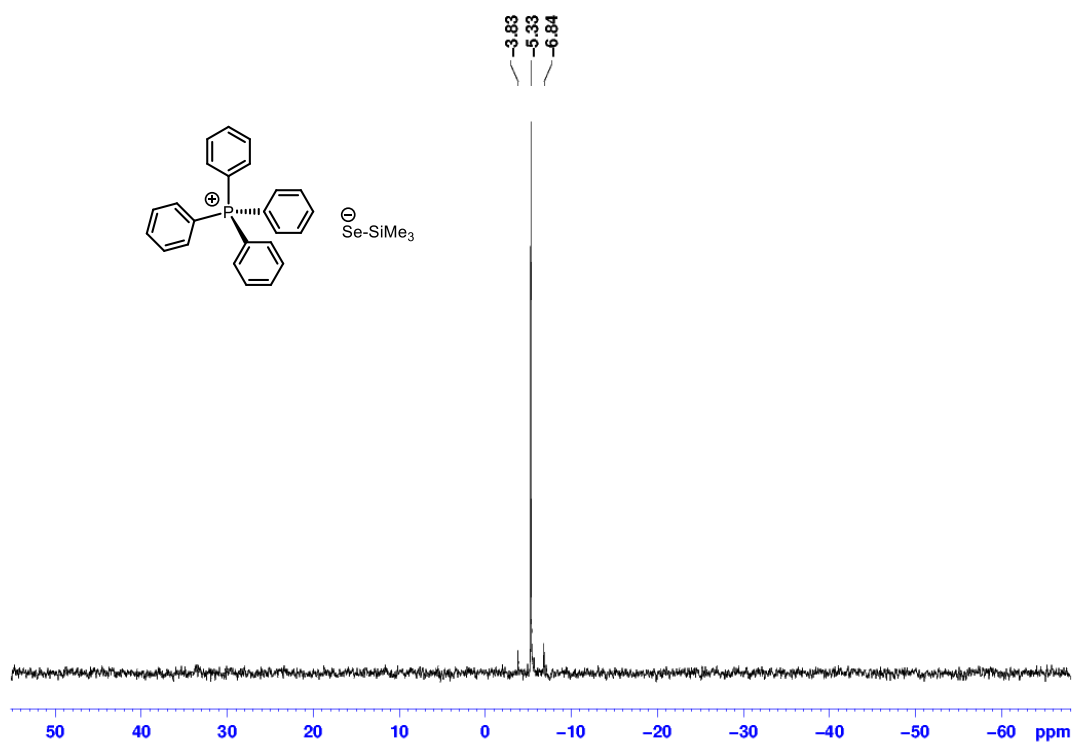

Figure S18.  $^{29}\text{Si}$ -NMR spectrum (59.65 MHz,  $\text{dms0-d}_6$ ) of  $\text{PPh}_4[\text{SeSiMe}_3]$  (**3-Se**).

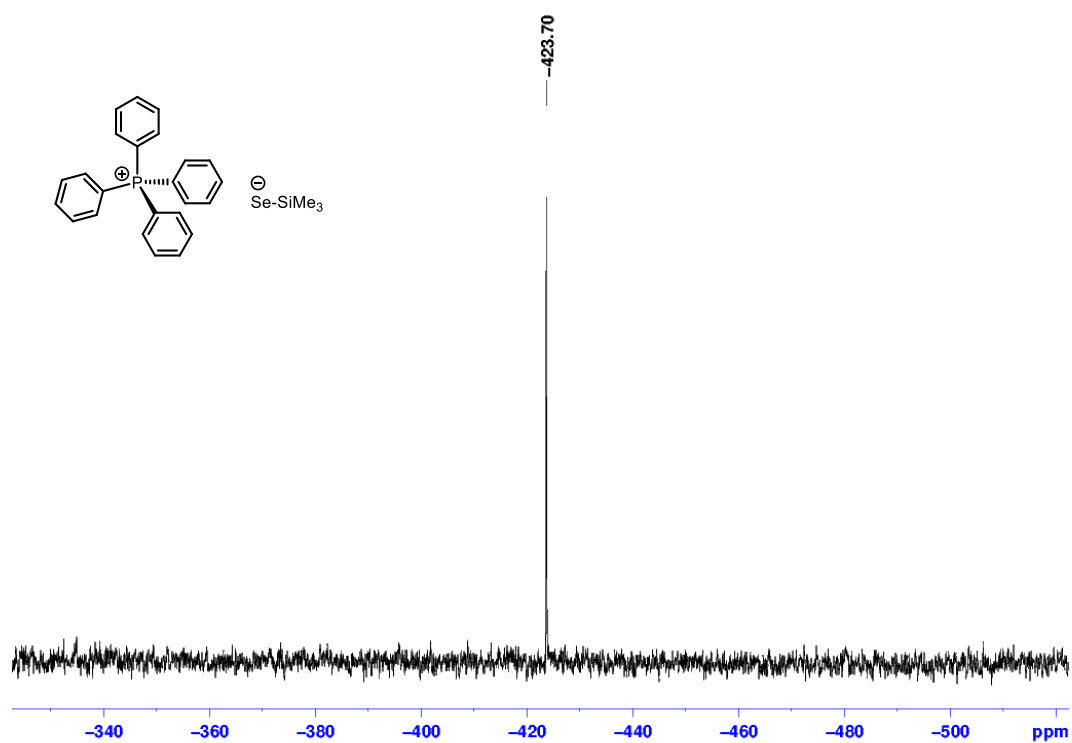

**Figure S19.**  $^{77}\text{Se}$ -NMR spectrum (57.26 MHz,  $\text{dms}\text{-d}_6$ ) of  $\text{PPh}_4[\text{SeSiMe}_3]$  (**3-Se**).

*Ph<sub>4</sub>P[TeSiMe<sub>3</sub>] (3-Te)*

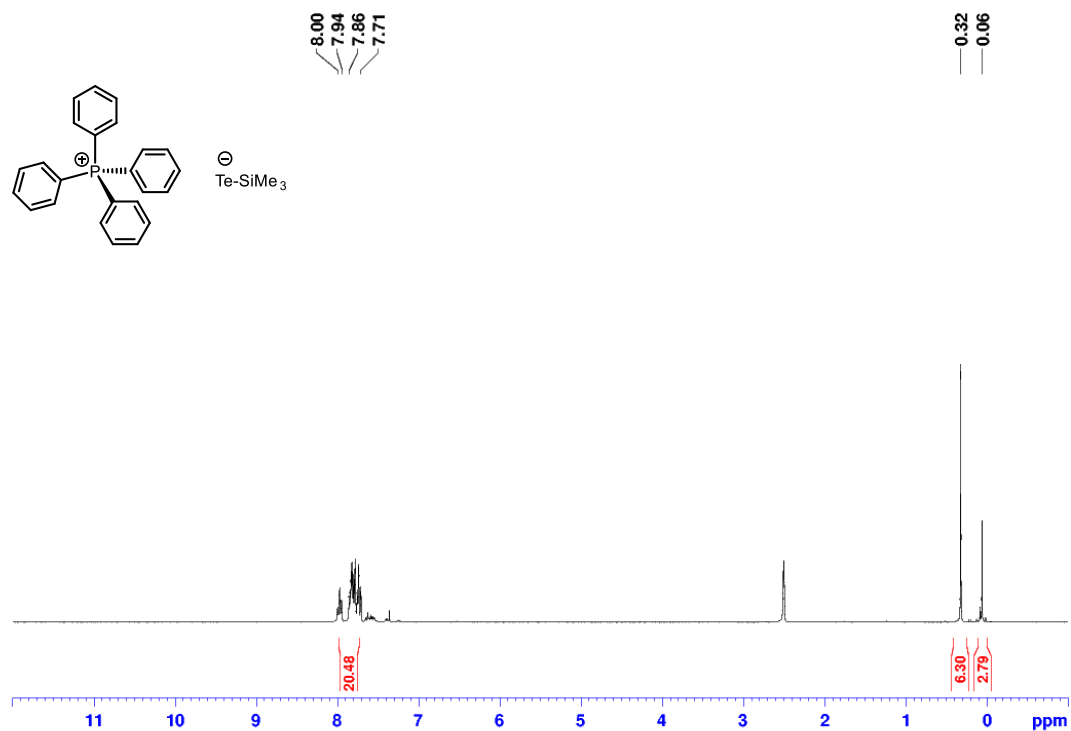

**Figure S20.**  $^1\text{H}$ -NMR spectrum (300.1 MHz,  $\text{dms}\text{-d}_6$ ) of  $\text{PPh}_4[\text{TeSiMe}_3]$  (**3-Te**). The signal at 0.06 ppm can be assigned to  $\text{O}(\text{SiMe}_3)_2$  which arises due to diffusion of  $\text{H}_2\text{O}$  into the NMR-sample.

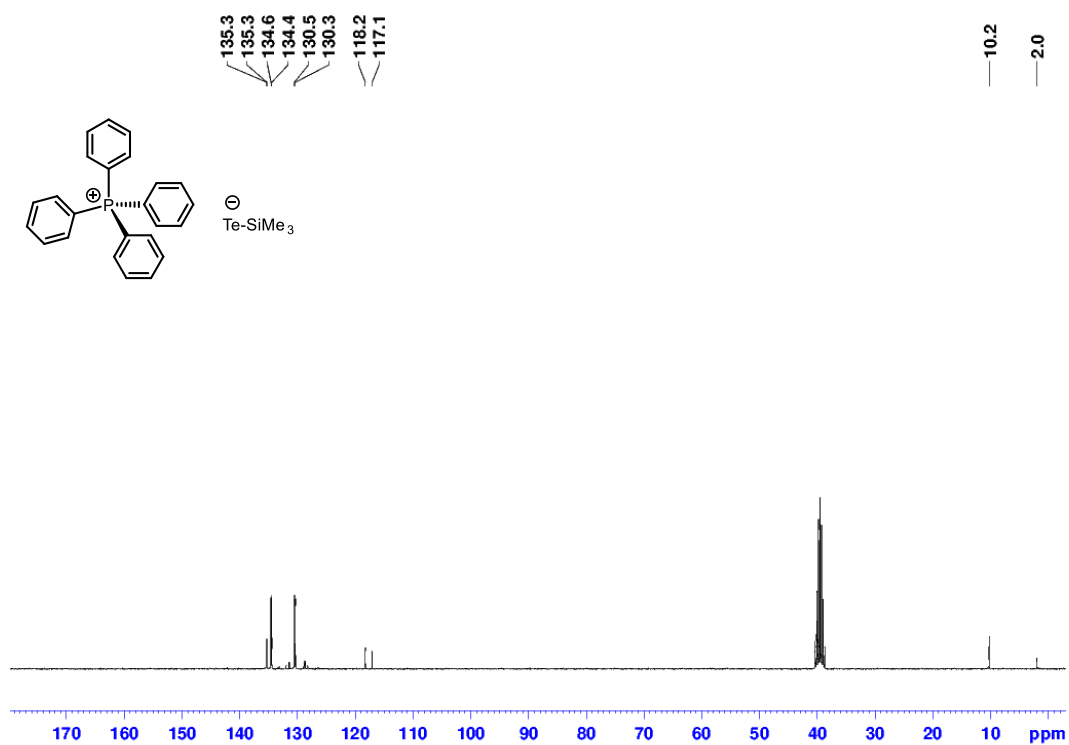

**Figure S21.**  $^{13}\text{C}$ -NMR spectrum (75.5 MHz,  $\text{dms0-d}_6$ ) of  $\text{PPh}_4[\text{TeSiMe}_3]$  (**3-Te**). The signal at 2.0 ppm can be assigned to  $\text{O}(\text{SiMe}_3)_2$  which arises due to diffusion of  $\text{H}_2\text{O}$  into the NMR-sample.

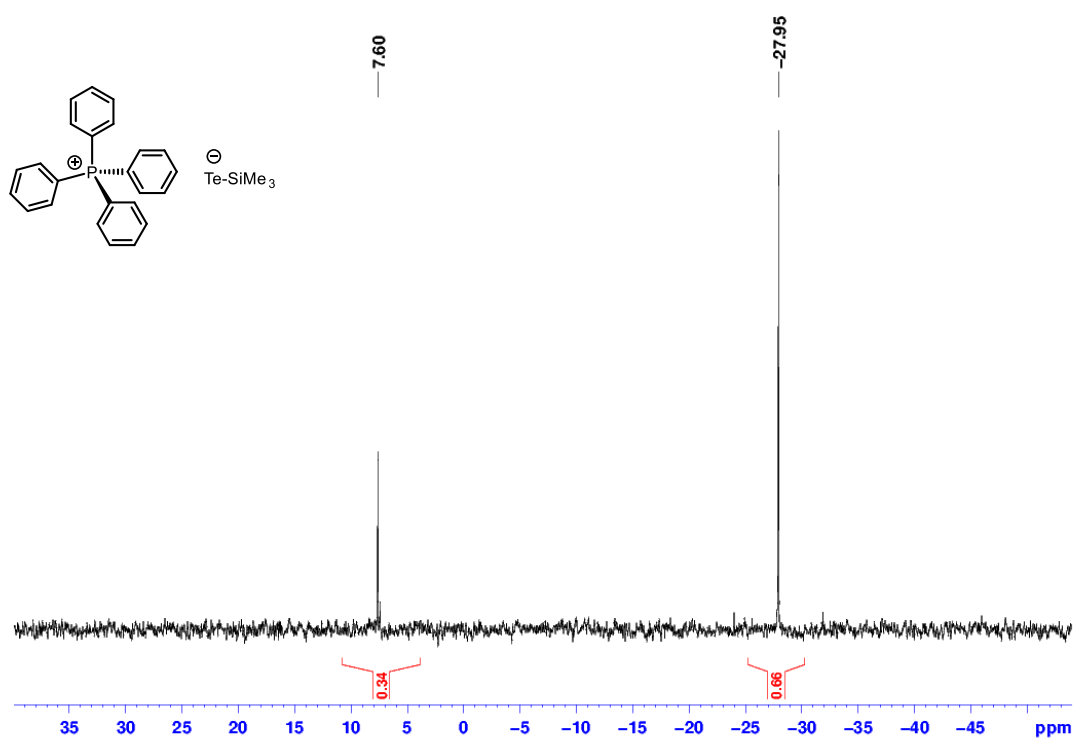

**Figure S22.**  $^{29}\text{Si}$ -NMR spectrum (59.65 MHz,  $\text{dms0-d}_6$ ) of  $\text{PPh}_4[\text{TeSiMe}_3]$  (**3-Te**). The signal at 7.6 ppm can be assigned to  $\text{O}(\text{SiMe}_3)_2$  which arises due to diffusion of  $\text{H}_2\text{O}$  into the NMR-sample.

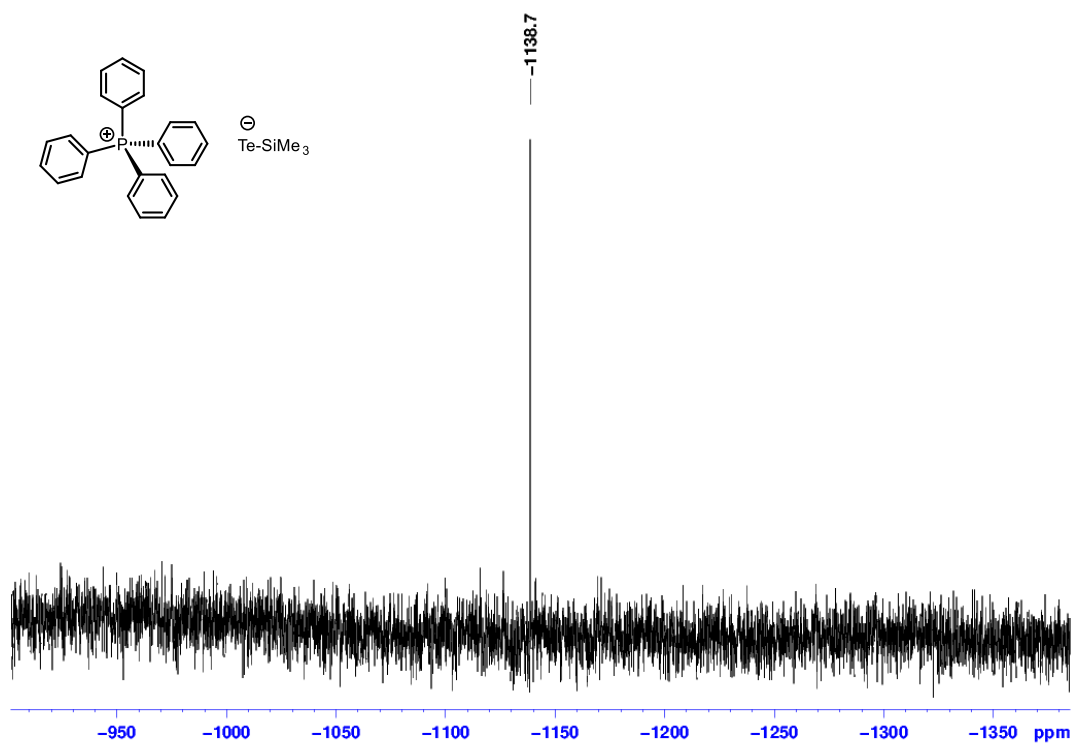

**Figure S23.**  $^{125}\text{Te}$ -NMR spectrum (94.73 MHz,  $\text{dms}\text{-d}_6$ ) of  $\text{PPh}_4[\text{TeSiMe}_3]$  (**3-Te**).

*Ph*<sub>4</sub>P[*Cp*<sub>3</sub>LaSSiMe<sub>3</sub>] (**4-S**)

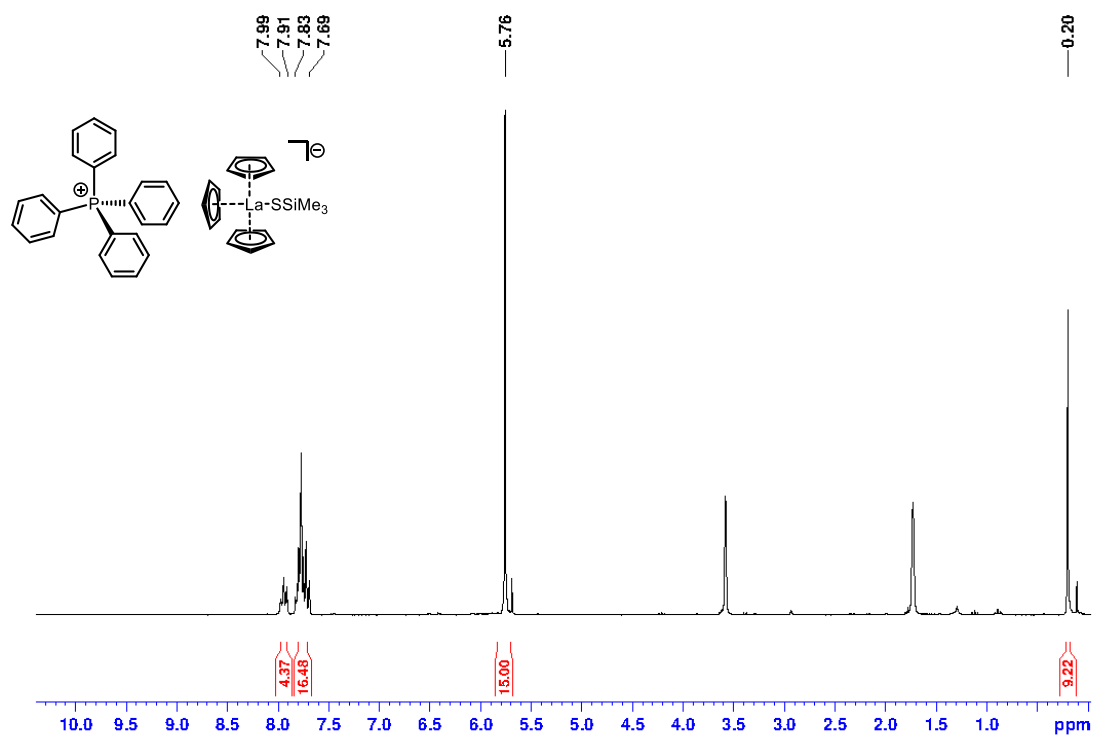

**Figure S24.**  $^1\text{H}$ -NMR spectrum (300.25 MHz,  $\text{thf-d}_8$ ) of  $\text{PPh}_4[\text{Cp}_3\text{LaSSiMe}_3]$  (**4-S**).

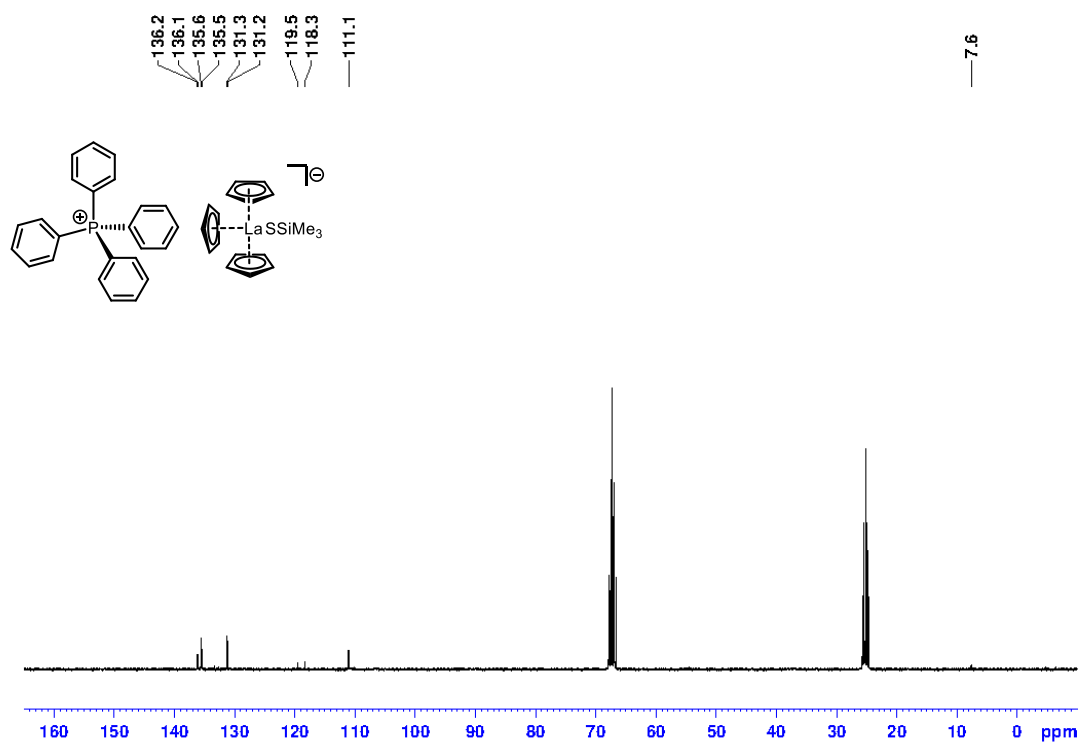

**Figure S25.**  $^{13}\text{C}$ -NMR spectrum (75.5 MHz,  $\text{thf-d}_8$ ) of  $\text{PPh}_4[\text{Cp}_3\text{LaSSiMe}_3]$  (4-S).

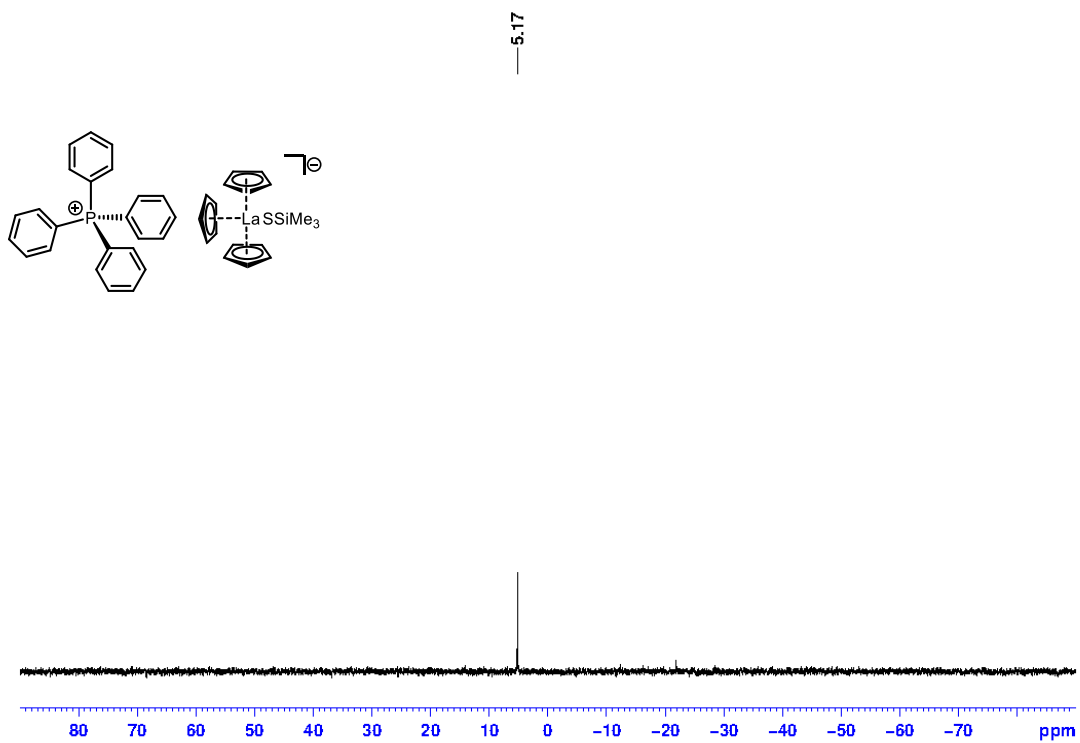

**Figure S26.**  $^{29}\text{Si}$ -NMR spectrum (59.65 MHz,  $\text{thf-d}_8$ )  $\text{PPh}_4[\text{Cp}_3\text{LaSSiMe}_3]$  (4-S).



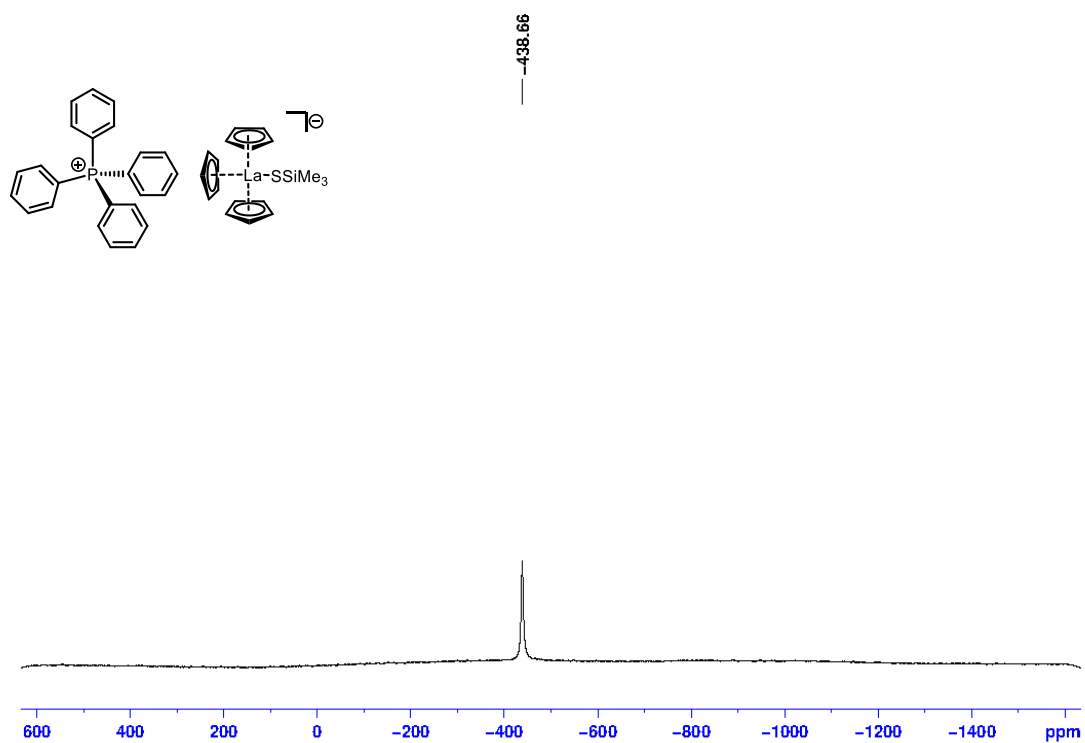

**Figure S27.**  $^{139}\text{La}$ -NMR spectrum (42.41 MHz,  $\text{thf-d}_8$ ) of  $\text{PPh}_4[\text{Cp}_3\text{LaSSiMe}_3]$  (**4-S**).

$\text{Ph}_4\text{P}[\text{Cp}_3\text{LaSeSiMe}_3]$  (**4-Se**)

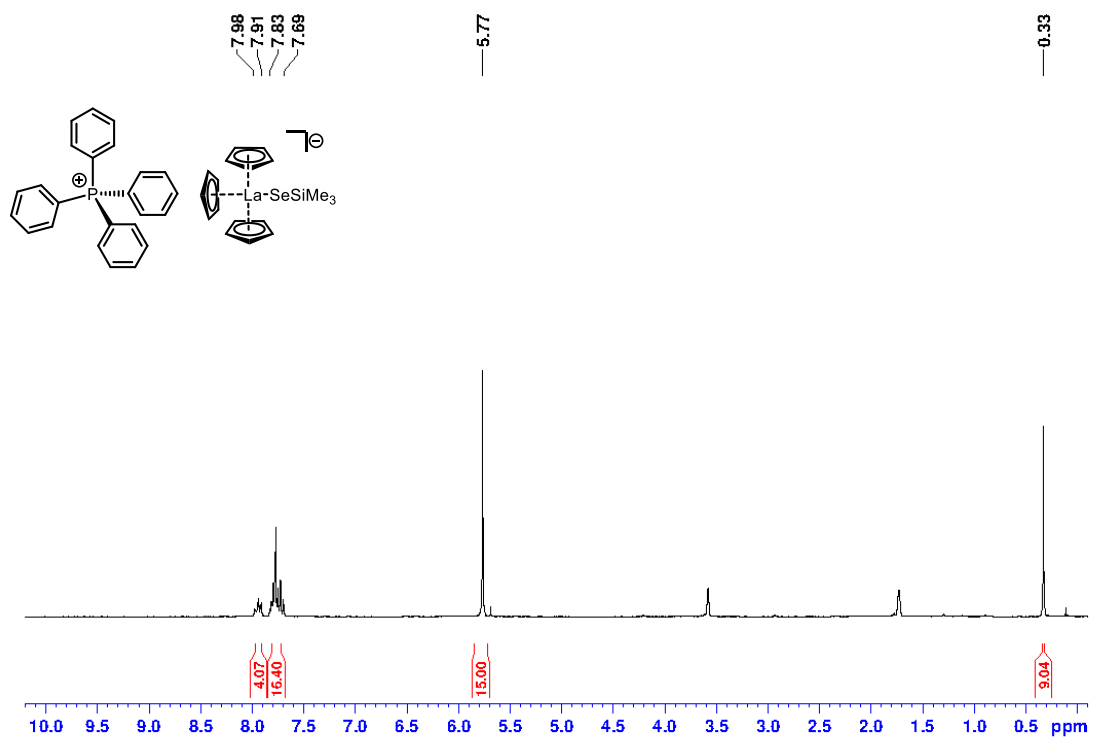

**Figure S28.**  $^1\text{H}$ -NMR spectrum (300.25 MHz,  $\text{thf-d}_8$ ) of  $\text{PPh}_4[\text{Cp}_3\text{LaSeSiMe}_3]$  (**4-Se**).

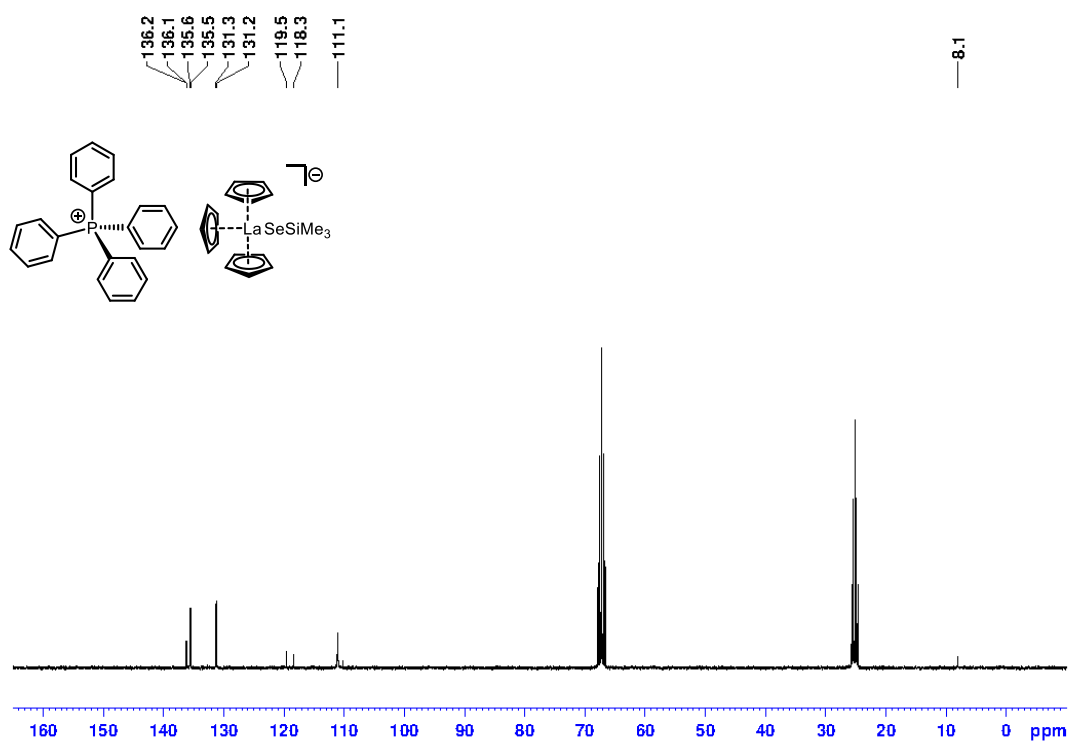

**Figure S29.**  $^{13}\text{C}$ -NMR spectrum (75.5 MHz, thf- $d_8$ ) of  $\text{PPh}_4[\text{Cp}_3\text{LaSeSiMe}_3]$  (**4-Se**).

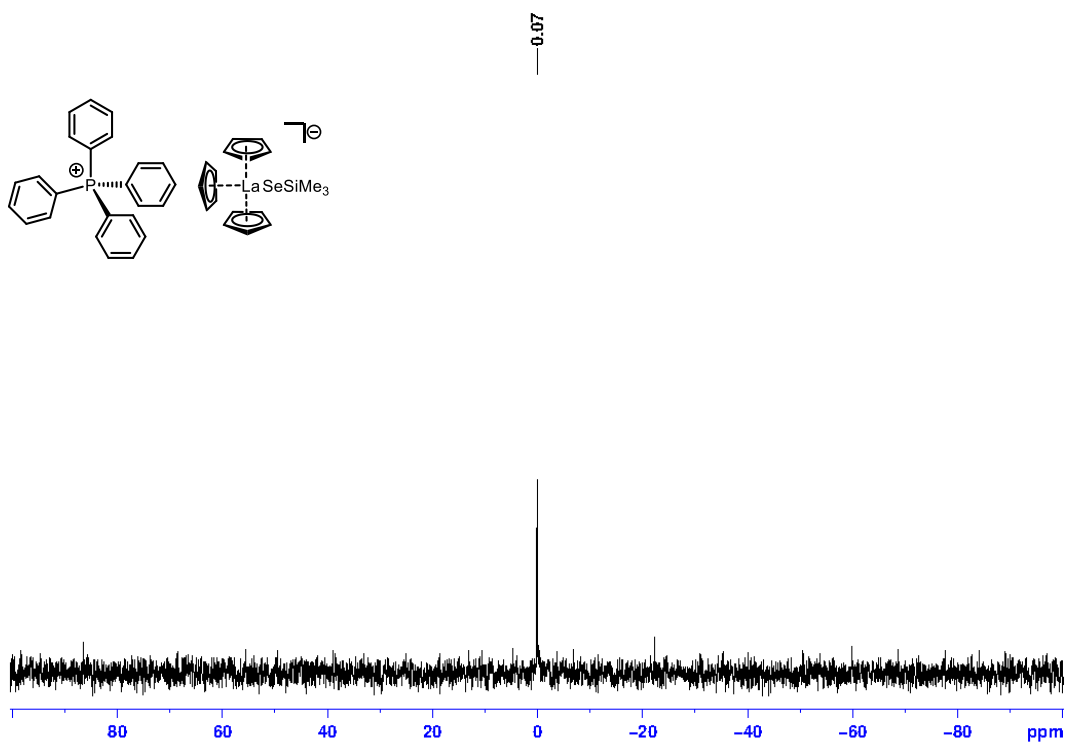

**Figure S30.**  $^{29}\text{Si}$ -NMR spectrum (59.65 MHz, thf- $d_8$ )  $\text{PPh}_4[\text{Cp}_3\text{LaSeSiMe}_3]$  (**4-Se**).

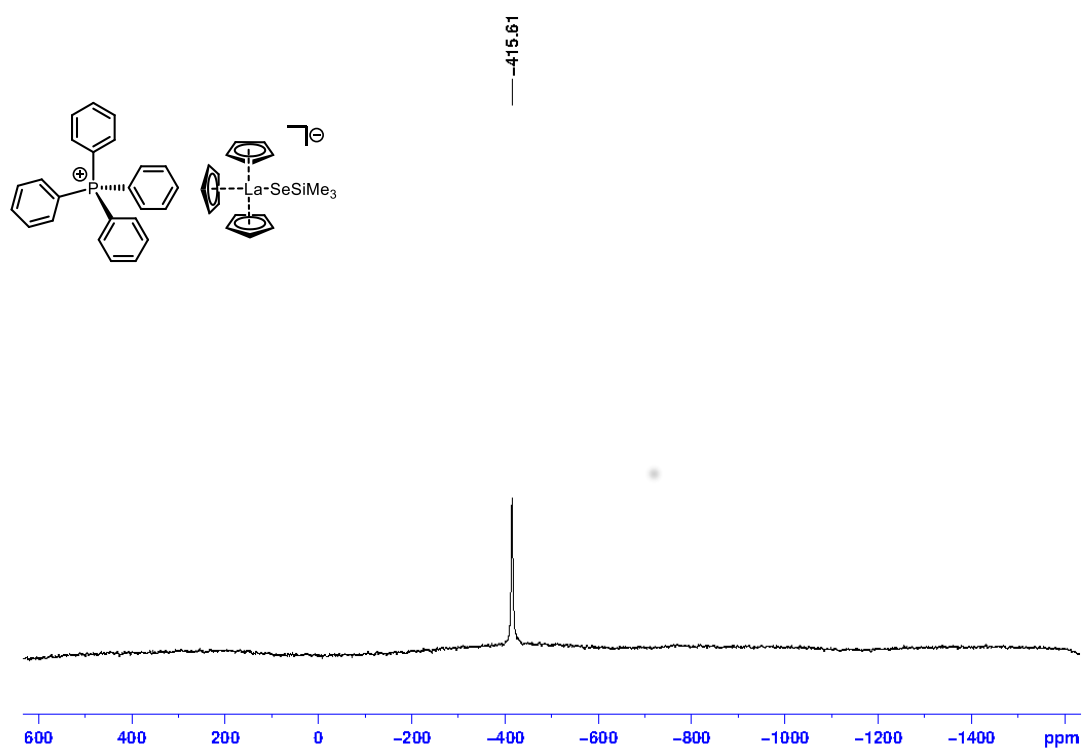

Figure S31.  $^{139}\text{La}$ -NMR spectrum (42.41 MHz,  $\text{thf-d}_8$ )  $\text{PPh}_4[\text{Cp}_3\text{LaSeSiMe}_3]$  (**4-Se**).

$\text{Ph}_4\text{P}[\text{Cp}_3\text{LaTeSiMe}_3]$  (**4-Te**)

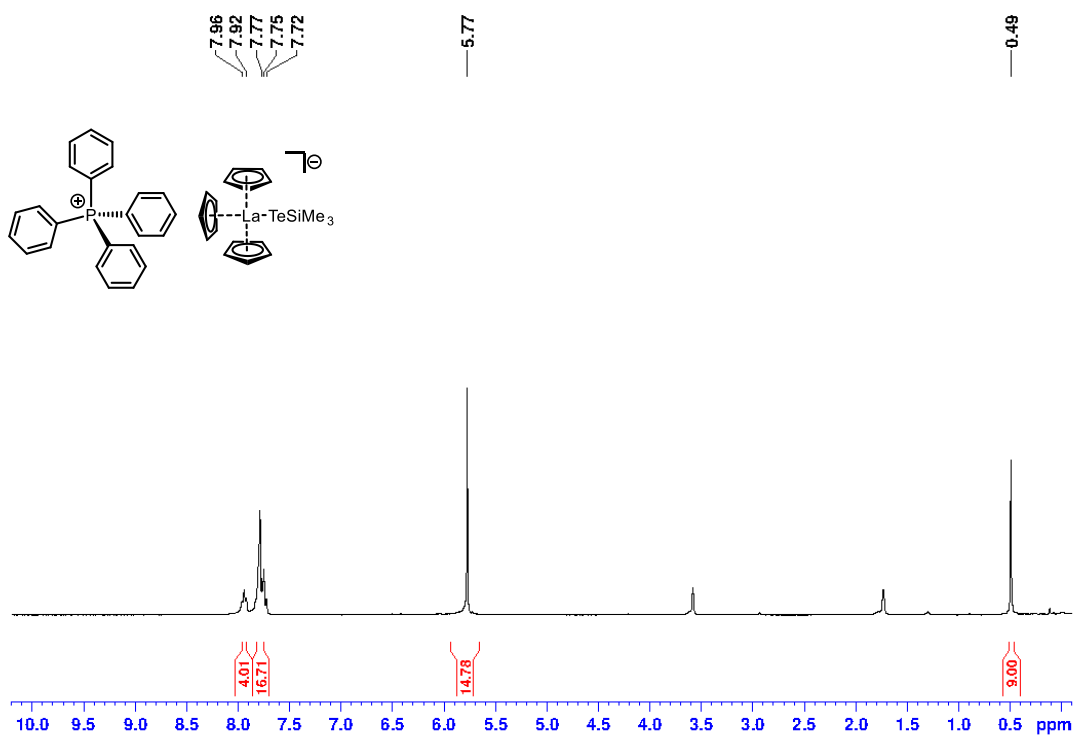

Figure S32.  $^1\text{H}$ -NMR spectrum (300.25 MHz,  $\text{thf-d}_8$ ) of  $\text{PPh}_4[\text{Cp}_3\text{LaTeSiMe}_3]$  (**4-Te**).

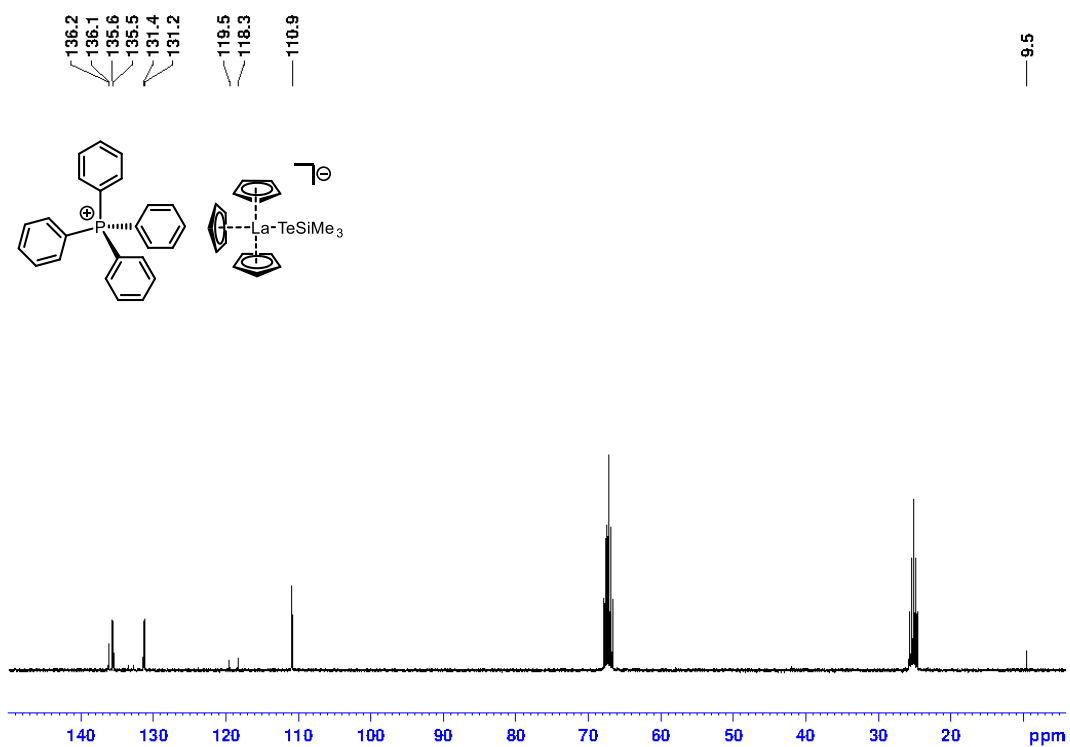

**Figure S33.**  $^{13}\text{C}$ -NMR spectrum (75.5 MHz,  $\text{thf-d}_8$ ) of  $\text{PPh}_4[\text{Cp}_3\text{LaTeSiMe}_3]$  (**4-Te**).

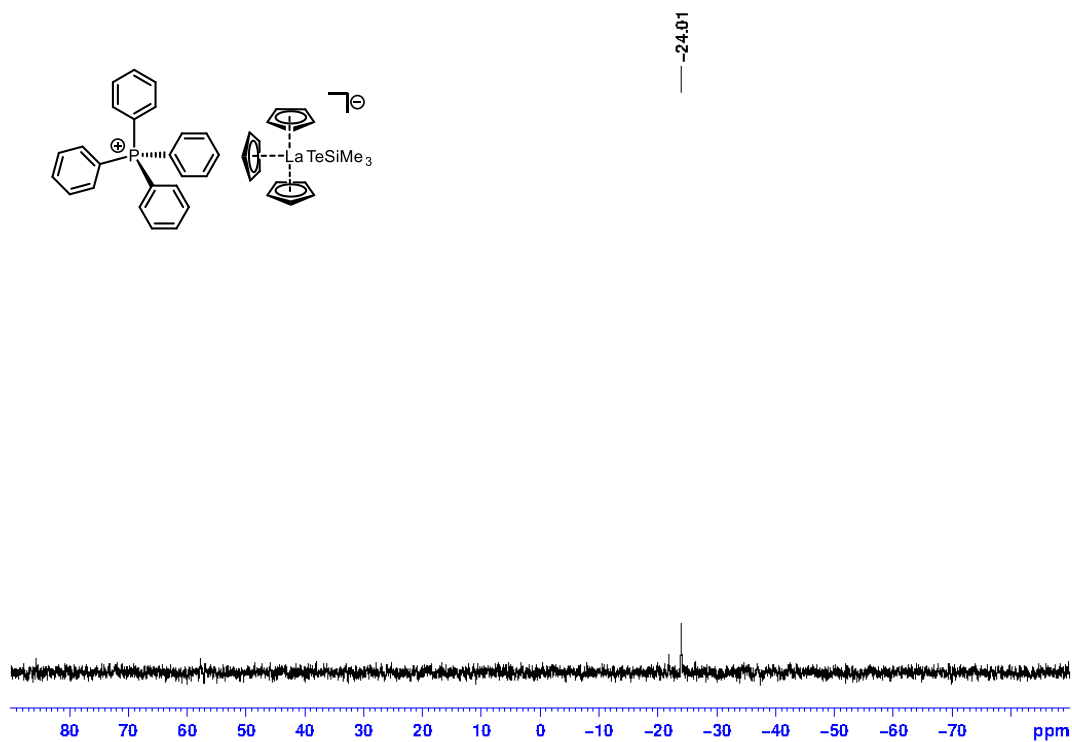

**Figure S34.**  $^{29}\text{Si}$ -NMR spectrum (59.65 MHz,  $\text{thf-d}_8$ )  $\text{PPh}_4[\text{Cp}_3\text{LaTeSiMe}_3]$  (**4-Te**).

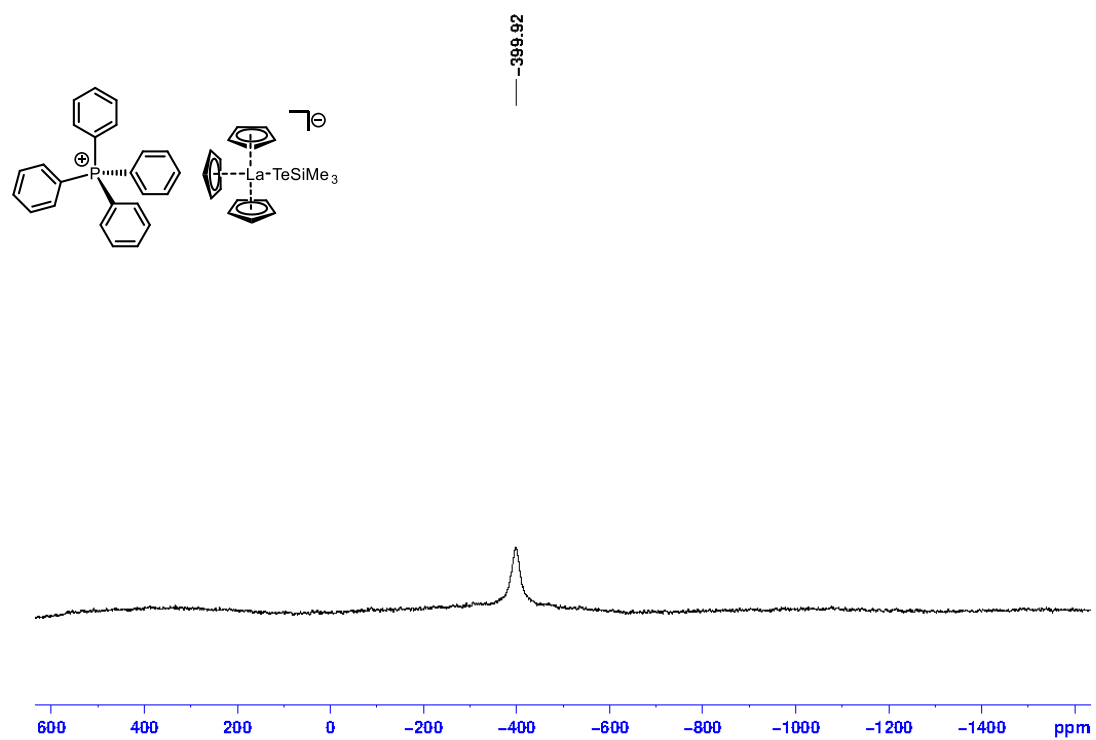

**Figure S35.**  $^{139}\text{La}$ -NMR spectrum (42.41MHz,  $\text{thf-d}_8$ )  $\text{PPh}_4[\text{Cp}_3\text{LaTeSiMe}_3]$  (**4-Te**).

### 3. Crystallographic data

The data collection for the single-crystal structure determination was performed on a Stoe Stadivari diffractometer (microfocus source, Cu-K $\alpha$  radiation, Dectris PILATUS 300K detector) or a Bruker D8 Quest diffractometer (microfocus source, Mo-K $\alpha$  radiation, PHOTON 100 or PHOTON III C14 detector) by the X-ray service department of the Fachbereich Chemie, University of Marburg at 100K. Information concerning the used hardware, and software used for Data collection, cell refinement and data reduction as well as structure solution and refinement can be reviewed in the following CIF-files: CCDC 2087069 PPh<sub>4</sub>F (**1**), 2087070 PPh<sub>4</sub>[S-TMS] (**3-S**), 2087071 PPh<sub>4</sub>[Se-TMS] (**3-Se**), 2087072 PPh<sub>4</sub>[Te-TMS] (**3-Te**), 2087073 (Me<sub>2</sub>N)<sub>3</sub>P=N=P(NMe<sub>2</sub>)<sub>3</sub>[OCO<sub>2</sub>Me] (**2-PPNMe<sub>2</sub>**), 2087074 PPh<sub>4</sub>[Cp<sub>3</sub>LaS-TMS] (**4-S**), 2087075 PPh<sub>4</sub>[Cp<sub>3</sub>LaSe-TMS] (**4-Se**), 2087076 PPh<sub>4</sub>[Cp<sub>3</sub>LaTe-TMS] (**4-Te**), and 2087077 Ph<sub>3</sub>P=N=PPh<sub>3</sub>[OCO<sub>2</sub>Me] x 0.5 MeCN (**2-PPN**). After solution (Shelxt)<sup>5</sup> and refinement process (Shelxl 2018/3)<sup>6,7</sup> the data was validated by using Platon.<sup>8</sup> All non-hydrogen atoms were refined with anisotropic displacement parameters. All hydrogen atoms were placed at calculated positions and included in the refinement using a riding model. All graphic representations were created with Diamond 4.<sup>9</sup> Displacement ellipsoid plots were prepared at 50% probability displacements for non-hydrogen atoms.

**Table S1:** XRD-data of **1**, **2-PPN** and **2-PPNMe<sub>2</sub>**

|                                                       | <b>Ph<sub>4</sub>PF (1)</b>                                   | <b>PPN[MeCO<sub>2</sub>] · 0.5 MeCN (2-PPN)</b>                              | <b>PPNMe<sub>2</sub>[MeCO<sub>2</sub>] (2-PPNMe<sub>2</sub>)</b>             |
|-------------------------------------------------------|---------------------------------------------------------------|------------------------------------------------------------------------------|------------------------------------------------------------------------------|
| <b>CCDC code</b>                                      | 2087069                                                       | 2087077                                                                      | 2087073                                                                      |
| <b>Identification code</b>                            | tvdpph4floesen                                                | hq07_0m_a_PPNMeCO3                                                           | TVD136loesen                                                                 |
| <b>Empirical formula</b>                              | C <sub>24</sub> H <sub>20</sub> FP                            | C <sub>78</sub> H <sub>69</sub> N <sub>3</sub> O <sub>6</sub> P <sub>4</sub> | C <sub>14</sub> H <sub>39</sub> N <sub>7</sub> O <sub>3</sub> P <sub>2</sub> |
| <b>Formula weight</b>                                 | 358.37                                                        | 1268.24                                                                      | 415.46                                                                       |
| <b>Temperature/K</b>                                  | 100(2)                                                        | 100(2)                                                                       | 100(2)                                                                       |
| <b>Crystal system</b>                                 | monoclinic                                                    | monoclinic                                                                   | triclinic                                                                    |
| <b>Space group</b>                                    | <i>P</i> 2 <sub>1</sub> / <i>n</i>                            | <i>P</i> 2 <sub>1</sub> / <i>c</i>                                           | <i>P</i> $\bar{1}$                                                           |
| <b>a/Å</b>                                            | 9.7884(4)                                                     | 10.620(2)                                                                    | 7.9237(2)                                                                    |
| <b>b/Å</b>                                            | 18.6328(6)                                                    | 35.750(7)                                                                    | 11.4184(4)                                                                   |
| <b>c/Å</b>                                            | 10.2715(4)                                                    | 17.320(3)                                                                    | 12.706(4)                                                                    |
| <b><math>\alpha</math>/°</b>                          | 90                                                            | 90                                                                           | 103.005(2)                                                                   |
| <b><math>\beta</math>/°</b>                           | 90.900(3)                                                     | 97.36(3)                                                                     | 98.958(2)                                                                    |
| <b><math>\gamma</math>/°</b>                          | 90                                                            | 90                                                                           | 96.125(2)                                                                    |
| <b>Volume/Å<sup>3</sup></b>                           | 1873.14(12)                                                   | 6521(2)                                                                      | 1094.44(6)                                                                   |
| <b>Z</b>                                              | 4                                                             | 4                                                                            | 2                                                                            |
| <b><math>\rho_{\text{calc}}</math>/cm<sup>3</sup></b> | 1.271                                                         | 1.292                                                                        | 1.261                                                                        |
| <b><math>\mu</math>/mm<sup>-1</sup></b>               | 1.398                                                         | 0.174                                                                        | 2.041                                                                        |
| <b>F(000)</b>                                         | 752                                                           | 2664                                                                         | 452                                                                          |
| <b>Crystal size/mm<sup>3</sup></b>                    | 0.226 × 0.186 × 0.155                                         | 0.633 × 0.310 × 0.232                                                        | 0.264 × 0.178 × 0.133                                                        |
| <b>Radiation</b>                                      | CuK $\alpha$ ( $\lambda$ = 1.54186)                           | MoK $\alpha$ ( $\lambda$ = 0.71073)                                          | CuK $\alpha$ ( $\lambda$ = 1.54186)                                          |
| <b>Theta range for data collection/°</b>              | 4.746 to 66.499                                               | 4.42 to 49.998                                                               | 4.017 to 66.482                                                              |
| <b>Index ranges</b>                                   | -11 ≤ h ≤ 10, -11 ≤ k ≤ 22, -10 ≤ l ≤ 12                      | -12 ≤ h ≤ 12, -42 ≤ k ≤ 42, -20 ≤ l ≤ 20                                     | -9 ≤ h ≤ 9, -10 ≤ k ≤ 13, -15 ≤ l ≤ 15                                       |
| <b>Reflections collected</b>                          | 13605                                                         | 175989                                                                       | 18979                                                                        |
| <b>Independent reflections</b>                        | 3299 [R <sub>int</sub> = 0.0234, R <sub>sigma</sub> = 0.0170] | 11537 [R <sub>int</sub> = 0.0607]                                            | 3829 [R <sub>int</sub> = 0.0354]                                             |
| <b>Completeness to <math>\theta</math> (x=)</b>       | 99.8% (x=66.499°)                                             | 99.9% (x= 25.000°)                                                           | 99.4% (x=66.482°)                                                            |
| <b>Absorption correction</b>                          | Semi-empirical from equivalents                               | Semi-empirical from equivalents                                              | Semi-empirical from equivalents                                              |
| <b>Max. and min. transmission</b>                     | 0.8143 and 0.3496                                             | 0.7455 and 0.6858                                                            | 0.5688 and 0.0930                                                            |
| <b>Refinement method</b>                              | Full-matrix least-squares on F <sup>2</sup>                   | Full-matrix least-squares on F <sup>2</sup>                                  | Full-matrix least-squares on F <sup>2</sup>                                  |
| <b>Data/restraints/parameters</b>                     | 3299/0/235                                                    | 11537/6/823                                                                  | 3829/0/248                                                                   |

|                                                |                                  |                                  |                                  |
|------------------------------------------------|----------------------------------|----------------------------------|----------------------------------|
| Goodness-of-fit on $F^2$                       | 1.037                            | 1.093                            | 1.030                            |
| Final R indexes [ $I > 2\sigma(I)$ ]           | $R_1 = 0.0312$ , $wR_2 = 0.0851$ | $R_1 = 0.0412$ , $wR_2 = 0.0905$ | $R_1 = 0.0478$ , $wR_2 = 0.1314$ |
| Final R indexes [all data]                     | $R_1 = 0.0339$ , $wR_2 = 0.0866$ | $R_1 = 0.0544$ , $wR_2 = 0.0961$ | $R_1 = 0.0554$ , $wR_2 = 0.1354$ |
| Largest diff. peak/hole / $e \text{ \AA}^{-3}$ | 0.313/-0.348                     | 0.608/-0.328                     | 0.280/-0.439                     |

**Table S2: XRD-data of 3-S, 3-Se, 3-Te.**

|                                                | <b>Ph<sub>4</sub>P[SSiMe<sub>3</sub>] (3-S)</b> | <b>Ph<sub>4</sub>P[SeSiMe<sub>3</sub>] (3-Se)</b> | <b>Ph<sub>4</sub>P[TeSiMe<sub>3</sub>] (3-Te)</b> |
|------------------------------------------------|-------------------------------------------------|---------------------------------------------------|---------------------------------------------------|
| CCDC code                                      | 2087070                                         | 2087071                                           | 2087072                                           |
| Identification code                            | jpg224loesen_Ph4PSSiMe3                         | af01_0m_a_Ph4PSeSiMe3                             | jpg354loesen_Ph4PTESiMe3                          |
| Empirical formula                              | C <sub>27</sub> H <sub>29</sub> PSSi            | C <sub>27</sub> H <sub>29</sub> PSeSi             | C <sub>27</sub> H <sub>29</sub> PSiTe             |
| Formula weight                                 | 444.62                                          | 491.52                                            | 540.16                                            |
| Temperature/K                                  | 100(2)                                          | 100(2)                                            | 100(2)                                            |
| Crystal system                                 | orthorhombic                                    | monoclinic                                        | monoclinic                                        |
| Space group                                    | <i>Pbca</i>                                     | <i>P2<sub>1</sub>/c</i>                           | <i>P2<sub>1</sub></i>                             |
| a/Å                                            | 17.6627(3)                                      | 10.511(2)                                         | 9.5283(2)                                         |
| b/Å                                            | 15.3022(3)                                      | 9.071(2)                                          | 10.6121(2)                                        |
| c/Å                                            | 18.0163(4)                                      | 26.773(5)                                         | 12.3821(3)                                        |
| $\alpha$ /°                                    | 90                                              | 90                                                | 90                                                |
| $\beta$ /°                                     | 90                                              | 99.08(3)                                          | 90.136(2)                                         |
| $\gamma$ /°                                    | 90                                              | 90                                                | 90                                                |
| Volume/Å <sup>3</sup>                          | 4869.41(17)                                     | 2520.8(9)                                         | 1252.02(5)                                        |
| Z                                              | 8                                               | 4                                                 | 2                                                 |
| $\rho_{\text{calc}}/\text{cm}^{-3}$            | 1.213                                           | 1.295                                             | 1.433                                             |
| $\mu/\text{mm}^{-1}$                           | 2.344                                           | 1.612                                             | 10.510                                            |
| F(000)                                         | 1888                                            | 1016                                              | 544                                               |
| Crystal size/mm <sup>3</sup>                   | 0.231 × 0.187 × 0.151                           | 0.624 × 0.286 × 0.197                             | 0.371 × 0.176 × 0.077                             |
| Radiation                                      | CuK $\alpha$ ( $\lambda = 1.54186$ )            | MoK $\alpha$ ( $\lambda = 0.71073$ )              | CuK $\alpha$ ( $\lambda = 1.54186$ )              |
| Theta range for data collection/°              | 4.909 to 66.496°                                | 2.296 to 27.124                                   | 7.14 to 132.974                                   |
| Index ranges                                   | -20 ≤ h ≤ 9, -18 ≤ k ≤ 18, -21 ≤ l ≤ 21         | -13 ≤ h ≤ 13, -11 ≤ k ≤ 11, -32 ≤ l ≤ 34          | -11 ≤ h ≤ 11, -12 ≤ k ≤ 11, -13 ≤ l ≤ 14          |
| Reflections collected                          | 42306                                           | 57425                                             | 19271                                             |
| Independent reflections                        | 4276 [ $R_{\text{int}} = 0.0326$ ]              | 5577 [ $R_{\text{int}} = 0.0480$ ]                | 3978 [ $R_{\text{int}} = 0.0501$ ]                |
| Completeness to $\theta$ ( $\chi$ )            | 99.8% ( $\chi = 66.496^\circ$ )                 | 100% ( $\chi = 25.000^\circ$ )                    |                                                   |
| Absorption correction                          | Semi-empirical from equivalents                 | Semi-empirical from equivalents                   | Semi-empirical from equivalents                   |
| Max. and min. transmission                     | 0.84333 and 0.3338                              | 0.7455 and 0.6221                                 |                                                   |
| Refinement method                              | Full-matrix least-squares on $F^2$              | Full-matrix least-squares on $F^2$                | Full-matrix least-squares on $F^2$                |
| Data/restraints/parameters                     | 4276/0/274                                      | 5577/0/274                                        | 3978/1/276                                        |
| Goodness-of-fit on $F^2$                       | 1.140                                           | 1.032                                             | 1.062                                             |
| Final R indexes [ $I > 2\sigma(I)$ ]           | $R_1 = 0.0357$ , $wR_2 = 0.1045$                | $R_1 = 0.0273$ , $wR_2 = 0.0588$                  | $R_1 = 0.0415$ , $wR_2 = 0.1103$                  |
| Final R indexes [all data]                     | $R_1 = 0.0395$ , $wR_2 = 0.1064$                | $R_1 = 0.0345$ , $wR_2 = 0.0615$                  | $R_1 = 0.0438$ , $wR_2 = 0.1119$                  |
| Largest diff. peak/hole / $e \text{ \AA}^{-3}$ | 0.219/-0.408                                    | 0.414/-0.318                                      | 1.043/-1.176                                      |
| Extinction coefficient                         |                                                 |                                                   | 0.0020(4)                                         |
| Absolute structure parameter                   |                                                 |                                                   | 0.051(10)                                         |

**Table S3: XRD-data of 4-S, 4-Se and 4-Te.**

|                                                              | Ph <sub>4</sub> P[Cp <sub>3</sub> LaSSiMe <sub>3</sub> ] (4-S)  | Ph <sub>4</sub> P[Cp <sub>3</sub> LaSeSiMe <sub>3</sub> ] (4-Se) | Ph <sub>4</sub> P[Cp <sub>3</sub> LaTeSiMe <sub>3</sub> ] (4-Te) |
|--------------------------------------------------------------|-----------------------------------------------------------------|------------------------------------------------------------------|------------------------------------------------------------------|
| CCDC code                                                    | 2087075                                                         | 2087074                                                          | 2087076                                                          |
| Identification code                                          | JGHW14_0m_a                                                     | JG360loesen                                                      | JG359La_0m_a                                                     |
| Empirical formula                                            | C <sub>42</sub> H <sub>44</sub> LaPSSi                          | C <sub>42</sub> H <sub>44</sub> LaPSeSi                          | C <sub>42</sub> H <sub>44</sub> LaPTeSi                          |
| Formula weight                                               | 778.80                                                          | 825.70                                                           | 874.34                                                           |
| Temperature/K                                                | 100(2)                                                          | 100(2)                                                           | 100(2)                                                           |
| Crystal system                                               | monoclinic                                                      | monoclinic                                                       | monoclinic                                                       |
| Space group                                                  | <i>P</i> 2 <sub>1</sub> / <i>c</i>                              | <i>P</i> 2 <sub>1</sub> / <i>n</i>                               | <i>P</i> 2 <sub>1</sub>                                          |
| <i>a</i> /Å                                                  | 14.343(3)                                                       | 14.1259(9)                                                       | 9.803(2)                                                         |
| <i>b</i> /Å                                                  | 15.499(3)                                                       | 17.0307(9)                                                       | 14.101(3)                                                        |
| <i>c</i> /Å                                                  | 16.998(34)                                                      | 17.0151(11)                                                      | 13.880(3)                                                        |
| $\alpha$ /°                                                  | 90                                                              | 90.00(3)                                                         | 90                                                               |
| $\beta$ /°                                                   | 100.44(3)                                                       | 111.185(5)                                                       | 102.94(3)                                                        |
| $\gamma$ /°                                                  | 90                                                              | 90.00(3)                                                         | 90                                                               |
| Volume/Å <sup>3</sup>                                        | 3704.3(13)                                                      | 3816.8(4)                                                        | 1869.8(7)                                                        |
| <i>Z</i>                                                     | 4                                                               | 4                                                                | 2                                                                |
| $\rho_{\text{calc}}$ /cm <sup>3</sup>                        | 1.396                                                           | 1.437                                                            | 1.553                                                            |
| $\mu$ /mm <sup>-1</sup>                                      | 1.313                                                           | 10.633                                                           | 2.010                                                            |
| <i>F</i> (000)                                               | 1592                                                            | 1664                                                             | 1016                                                             |
| Crystal size/mm <sup>3</sup>                                 | 0.2161 × 0.211 × 0.154                                          | 0.192 × 0.146 × 0.078                                            | 0.396 × 0.166 × 0.128                                            |
| Radiation                                                    | MoK $\alpha$ ( $\lambda$ = 0.71073)                             | CuK $\alpha$ ( $\lambda$ = 1.54186)                              | MoK $\alpha$ ( $\lambda$ = 0.71073)                              |
| Theta range for data collection/°                            | 2.161 to 25.753                                                 | 3.502 to 66.593                                                  | 2.318 to 25.759                                                  |
| Index ranges                                                 | -17 ≤ <i>h</i> ≤ 17, -18 ≤ <i>k</i> ≤ 18, -20 ≤ <i>l</i> ≤ 20   | -16 ≤ <i>h</i> ≤ 16, -18 ≤ <i>k</i> ≤ 20, -20 ≤ <i>l</i> ≤ 16    | -11 ≤ <i>h</i> ≤ 11, -17 ≤ <i>k</i> ≤ 17, -16 ≤ <i>l</i> ≤ 16    |
| Reflections collected                                        | 98887                                                           | 35700                                                            | 54711                                                            |
| Independent reflections                                      | 7056 [ <i>R</i> <sub>int</sub> = 0.0503]                        | 6749 [ <i>R</i> <sub>int</sub> = 0.0480]                         | 7108 [ <i>R</i> <sub>int</sub> = 0.0320]                         |
| Completeness to $\theta$ ( <i>x</i> =)                       | 100.0% ( <i>x</i> =25.000°)                                     | 99.9% ( <i>x</i> = 66.593°)                                      | 99.9% ( <i>x</i> =25.000°)                                       |
| Absorption correction                                        | Semi-empirical from equivalents                                 | Semi-empirical from equivalents                                  | Semi-empirical from equivalents                                  |
| Max. and min. transmission                                   | 0.7453 and 0.6766                                               | 0.0036 and 0.0004                                                | 0.7453 and 0.6301                                                |
| Refinement method                                            | Full-matrix least-squares on <i>F</i> <sup>2</sup>              | Full-matrix least-squares on <i>F</i> <sup>2</sup>               | Full-matrix least-squares on <i>F</i> <sup>2</sup>               |
| Data/restraints/parameters                                   | 7056/0/418                                                      | 6749/0/418                                                       | 7108/1/418                                                       |
| Goodness-of-fit on <i>F</i> <sup>2</sup>                     | 1.063                                                           | 0.958                                                            | 1.052                                                            |
| Final <i>R</i> indexes [ <i>I</i> ≥ 2 $\sigma$ ( <i>I</i> )] | <i>R</i> <sub>1</sub> = 0.0208, <i>wR</i> <sub>2</sub> = 0.0448 | <i>R</i> <sub>1</sub> = 0.0328, <i>wR</i> <sub>2</sub> = 0.0807  | <i>R</i> <sub>1</sub> = 0.0149, <i>wR</i> <sub>2</sub> = 0.0342  |
| Final <i>R</i> indexes [all data]                            | <i>R</i> <sub>1</sub> = 0.0273, <i>wR</i> <sub>2</sub> = 0.0466 | <i>R</i> <sub>1</sub> = 0.0382, <i>wR</i> <sub>2</sub> = 0.0821  | <i>R</i> <sub>1</sub> = 0.0156, <i>wR</i> <sub>2</sub> = 0.0345  |
| Largest diff. peak/hole / e Å <sup>-3</sup>                  | 0.370/-0.428                                                    | 0.984/-0.561                                                     | 0.627/-0.457                                                     |



## XRD-Molecular Structures

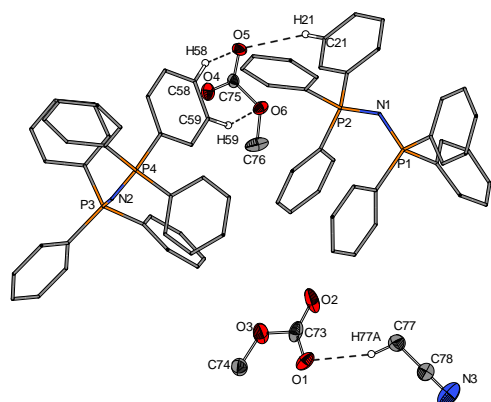

**Figure S36.** Molecular structure of PPN[OCO<sub>2</sub>Me] (**2-PPN**). Ellipsoids of the anions are shown at the 50% level. Only protons involved in some H-Bonds shown for clarity. Selected bond lengths (in Å) and angles (in °): O1-C73 1.244(3), O2-C73 1.238(3), O3-C73 1.415(3), O3-C74 1.410(3), O1-C73-O2 130.8(2), O1-C73-O3 115.4(2), O2-C73-O3 113.8(2), C73-O3-C74 117.0(2), C74-O3-C73-O1 4.0(3), C74-O3-C73-O2 -175.4(2), N3-C78 1.132(3), C78-C77 1.441(4), N3-C78-C77 179.1(3), C77-H77A 0.98, C78-C77-H77A 160.9(2), H77A-O1 2.406(2), C77-H77A-O1 160.9(2), C73-O1-H77A 94.6(2), C73-O1-H77A-C77 32.2(6), O4-C75 1.231(3), O5-C75 1.231(3), O6-C75 1.406(3), O6-C76 1.421(3), O4-C75-O5 130.6(2), O4-C75-O6 116.9(2), O5-C75-O6 112.5(2), C75-O6-C76 116.1(2), C21-H21 0.95, O5-H21 2.50, O5-H21-C21 143.9(1), C75-O5-H21-C21 -81.1(3), C58-H58 0.95, O5-H58 2.34, O5-H58-C58 150.7(1), C75-O5-H58-C58 16.2(3), C59-H59 0.95, O6-H59 2.499(2), C59-H59-O6 140.7(1), C59-H59-O6-C75 -6.6(3).

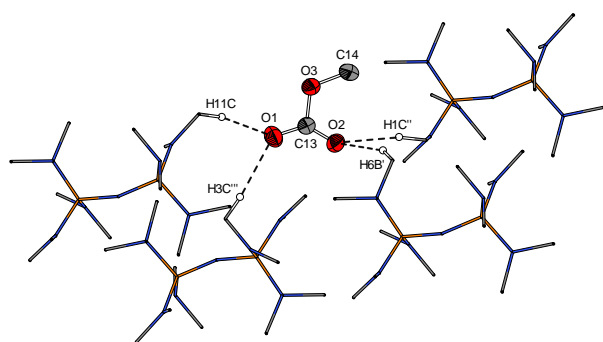

**Figure S37.** Molecular structure of PPNMe<sub>2</sub>[OCO<sub>2</sub>Me] (**2-PPNNMe<sub>2</sub>**). Ellipsoids of the anions are shown at the 50% level. Only protons involved in H-Bonds shown for clarity. Selected bond lengths (in Å) and angles (in °): O3-C14 1.424(3), C13-O3 1.421(3), C13-O1 1.223(3), C13-O2 1.226(3), O2-H11C'' 2.487(2), O2-H6B' 2.481(2), O1-H11C 2.472(2), O1-H3C'' 2.497(2), O1-C13-O2 131.3(2), O2-C13-O3 116.6(2), O1-C13-O3 112.1(2), Symmetry operations: I: x, -1+y, z; II: 1+x, -1+y, z, III: 1-x, 1-y, 1-z.

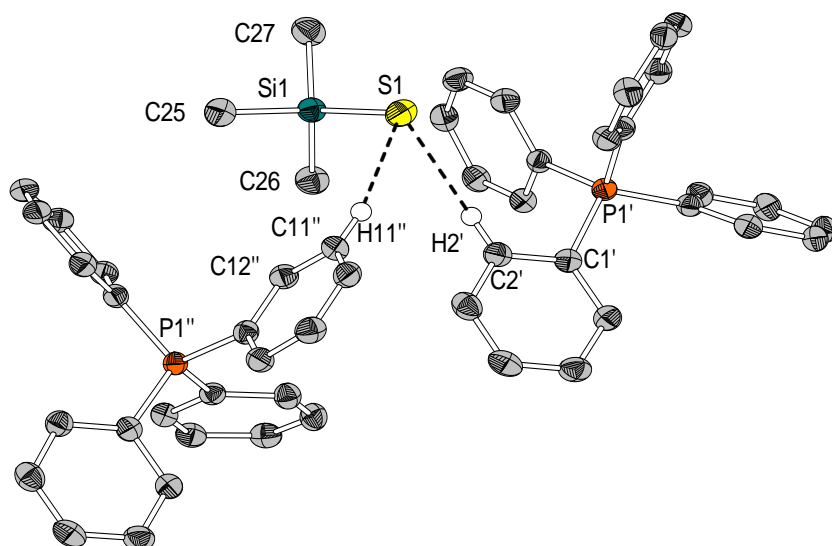

**Figure S38.** Molecular structure of  $\text{Ph}_4\text{P}[\text{SSiMe}_3]$  (**3-S**). Ellipsoids are shown at the 50% level. Only protons involved in H-Bonds shown for clarity. Selected bond lengths (in Å) and angles (in °): S1-Si1 2.0647(8), Si1-C25 1.885(2), Si1-C26 1.885(2), Si1-C27 1.884(2), S1-Si1-C25 115.37(7), S1-Si1-C26 111.30(7), S1-Si1-C27 111.43(7), C25-Si1-C26 106.14(9), C26-Si1-C27 108.7(1), C27-Si1-C25 103.4(1), S1-H2' 2.82, C2'-H2' 0.93, S1-H2'-C2' 143(1), Si1-S1-H2'-C2' -138.9(2), C1'-C2' 1.393(3), C1'-C2'-H2' 120.3(2), C1'-C2'-H2'-S1' -120.2(2), S1-H11'' 2.85, C11''-H11'' 0.93, Si1-S1-H11''-C11'' 22.8(3), C12''-C11'' 1.385(3), C12''-C11''-H11'' 120.2(2), C12''-C11''-H11''-S1 -1.7(4). Symmetry operations: I:  $1/2+x, y, 1/2-z$ ; II:  $1-x, -1/2+y, 1/2-z$ .

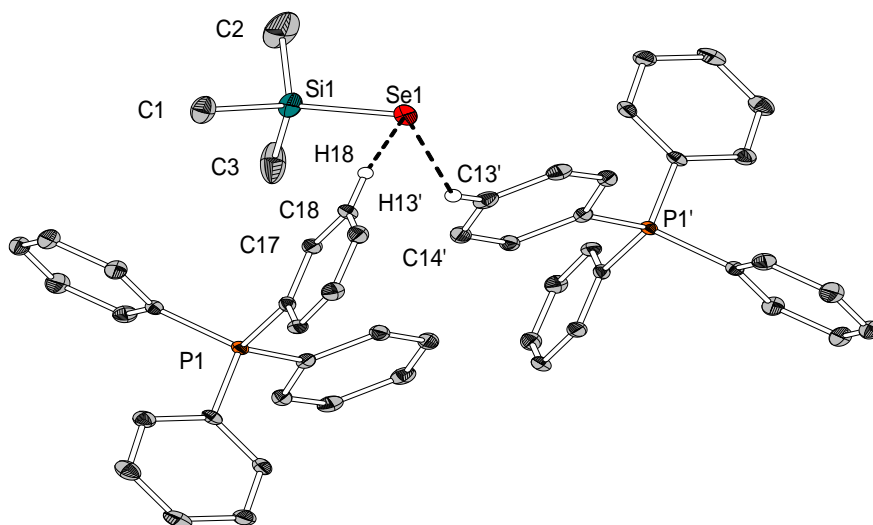

**Figure S39.** Crystallographically determined molecular structure of  $\text{Ph}_4\text{P}[\text{SeSiMe}_3]$  (**3-Se**). Ellipsoids of are shown at the 50% level. Only protons involved in H-Bonds shown for clarity. Selected bond lengths (in Å) and angles (in °): Se1-Si1 2.2102(9), Si1-C1 1.882(2), Si1-C2 1.880(3), Si1-C3 1.880(3), Se1-Si1-C1 113.75(7), Se1-Si1-C2 111.0(1), Se1-Si1-C3 112.9(8), C1-Si1-C2 111.01(1), C2-Si1-C3 108.0(2), C3-Si1-C1 106.0(1), Se1-H13' 2.93, C13'-H13' 0.95, Se1-H13'-C13' 144.9(1), Si1-Se1-H13'-C13' 108.6(2), C14'-C13' 1.389(3), C14'-C13'-H13' 119.9, C14'-C13'-H13'-Se1 -147.5(1), Se1-H18 2.92, Se1-H18-C18 132.4(1), Si1-Se1-H18-C18 70.1(1), C17-C18 1.385(2), C17-C18-H18 120.0, C17-C18-H18-Se1 -21.6(2). Symmetry operations: I:  $2-x, 1-y, 1-z$ .

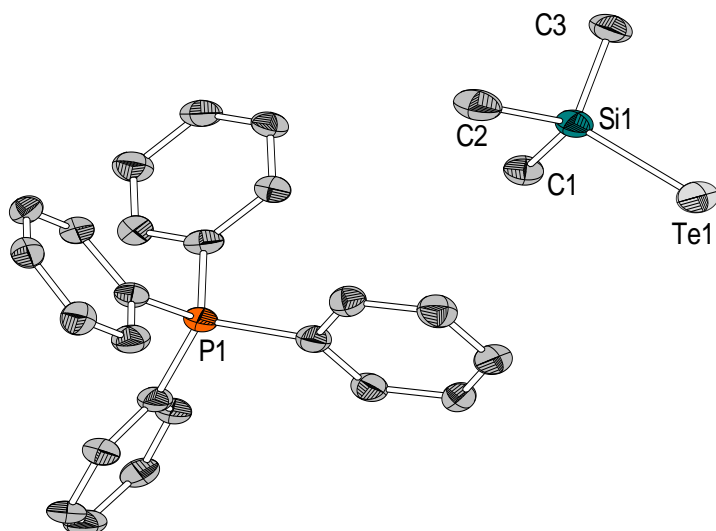

**Figure S40.** Crystallographically determined molecular structure of  $\text{Ph}_4\text{P} [\text{TeSiMe}_3]$  (**3-Te**). Ellipsoids are shown at the 50% level. Protons are omitted for clarity. Selected bond lengths (in Å) and angles (in °): Te1-Si1 2.447(2), Si1-C1 1.884(9), Si1-C2 1.89(1), Si1-C3 1.89(1), Te1-Si1-C1 111.7(3), Te1-Si1-C2 113.8(3), Te1-Si1-C3 113.8(3), C1-Si1-C2 106.9(4), C2-Si1-C3 104.5(4), C3-Si1-C1 105.5(4).

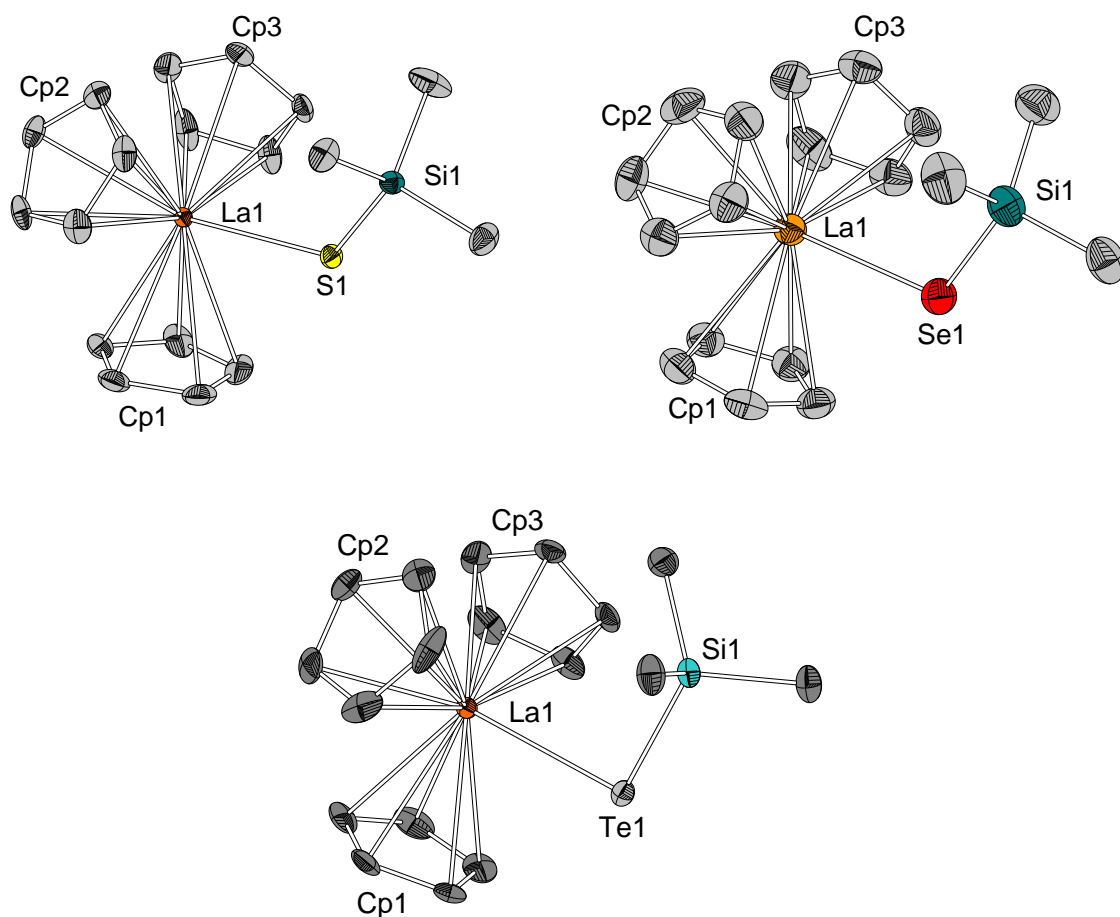

**Figure S41.** Crystallographically determined molecular structures of  $\text{Ph}_4\text{P} [\text{Cp}_3\text{LaSSiMe}_3]$  (**4-S**) (top row left),  $\text{Ph}_4\text{P} [\text{Cp}_3\text{LaSeSiMe}_3]$  (**4-Se**) (top row right) and  $\text{Ph}_4\text{P} [\text{Cp}_3\text{LaTeSiMe}_3]$  (**4-Te**) (bottom row). There are no bonding interactions within ion pairs. Ellipsoids are shown at the 50% level. The cation and protons are omitted for clarity. Refer to Table S4 for important bond lengths- and angles.

**Table S4:** Selected bond lengths (in Å) and angles (in °): **4-S** (left row), **4-Se** (middle row) and **4-Te** (right row). As all Cp-rings are connected to La in a  $\eta^5$ -fashion, bond parameters with Cp refer to the  $C_{p_{\text{centroid}}}$  position always.

| <b>4-S</b>     |            | <b>4-Se</b>     |            | <b>4-Te</b>     |            |
|----------------|------------|-----------------|------------|-----------------|------------|
| La1-S1         | 2.9222(7)  | La1-Se1         | 2.998(6)   | La1-Te1         | 3.283(8)   |
| S1-Si1         | 2.098(8)   | Se1-Si1         | 2.236(1)   | Te1-Si1         | 2.475(1)   |
| La1-S1-Si1     | 128.33(3)  | La1-Se1-Si1     | 117.34(4)  | La1-Te1-Si1     | 106.27(3)  |
| S1-La1-Cp3     | 104.01(2)  | Se1-La1-Cp3     | 104.59(1)  | Te1-La1-Cp3     | 106.86(1)  |
| S1-La1-Cp2     | 107.27(2)  | Se1-La1-Cp2     | 104.74(1)  | Te1-La1-Cp2     | 101.46(1)  |
| S1-La1-Cp1     | 94.49(2)   | Se1-La1-Cp1     | 95.54(1)   | Te1-La1-Cp1     | 95.96(1)   |
| La1-Cp3        | 2.6249(7)  | La1-Cp3         | 2.6075(3)  | La1-Cp3         | 2.5950(6)  |
| La1-Cp2        | 2.6047(8)  | La1-Cp2         | 2.5951(3)  | La1-Cp2         | 2.5949(8)  |
| La1-Cp1        | 2.5885(9)  | La1-Cp1         | 2.6137(4)  | La1-Cp1         | 2.5977(6)  |
| Cp3-La1-Cp2    | 112.93(2)  | Cp3-La1-Cp2     | 116.28(1)  | Cp3-La1-Cp2     | 115.82(1)  |
| Cp2-La1-Cp1    | 117.54(2)  | Cp2-La1-Cp1     | 116.25(1)  | Cp2-La1-Cp1     | 116.59(1)  |
| Cp1-La1-Cp3    | 117.17(2)  | Cp1-La1-Cp3     | 115.51(1)  | Cp1-La1-Cp3     | 116.08(1)  |
| Si1-C40        | 1.868(3)   | Si1-C42         | 1.872(4)   | Si1-C42         | 1.873(4)   |
| Si1-C42        | 1.874(3)   | Si1-C40         | 1.868(5)   | Si1-C41         | 1.875(4)   |
| Si1-C41        | 1.879(3)   | Si-C41          | 1.879(5)   | Si1-C40         | 1.877(5)   |
| Si-S-La-Cp1    | -170.36(4) | Si1-Se1-La1-Cp1 | -174.81(3) | Si1-Te1-La1-Cp1 | -175.88(3) |
| La1-S1-Si1-C41 | 179.4(1)   | La1-Se1-Si1-C41 | -170.7(1)  | La1-Te1-Si1-C40 | -17.5(1)   |

## 4. Thermal Analysis Studies

TGA measurements were performed in a glovebox under nitrogen inertgas with a DSC-TGA 3 (Mettler Toledo) for a limited number of samples in order to get a first impression of the decomposition temperatures of certain ionic products. The results are presented in Figure S42 and Figure S43

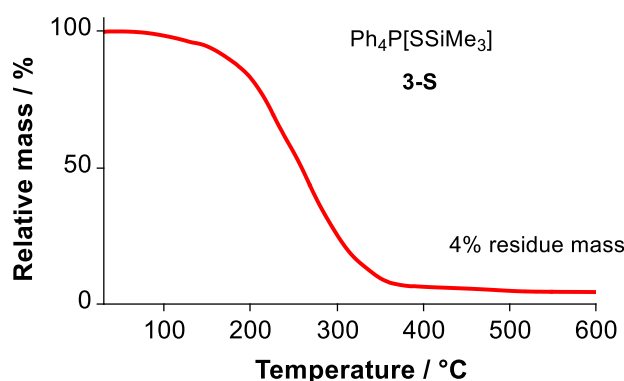

Figure S42: TGA measurement of 3-S (30°C-600°C, 10 K min<sup>-1</sup>).

Figure S43 shows the thermogravimetric measurements for 4-S and 4-Te.

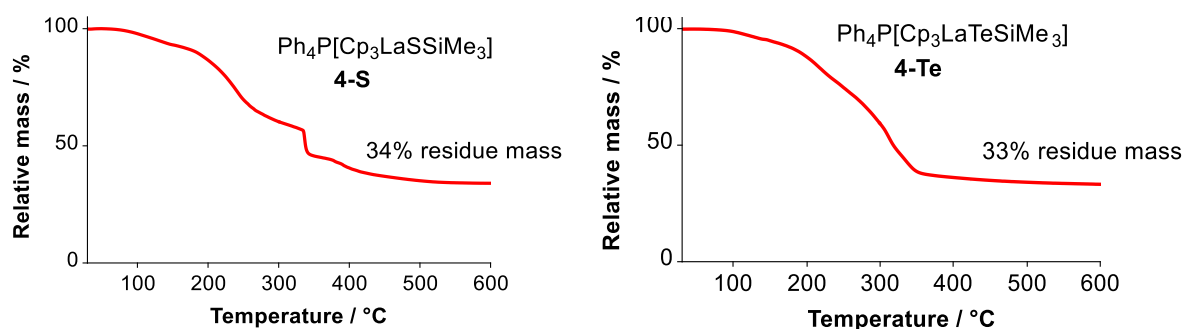

Figure S43. TGA measurements of 4-S (left) and 4-Te (right) (30°C-600°C, 10 K min<sup>-1</sup>).

## 5. References

- 1 C. Bolli, J. Gellhaar, C. Jenne, M. Keßler, H. Scherer, H. Seeger and R. Uzun, *Dalton Trans.*, 2014, **43**, 4326–4334.
- 2 R. Link and R. Schwesinger, *Angew. Chem. Int. Ed.*, 1992, **31**, 850. *Angew. Chem.*, 1992, **104**, 864.
- 3 R. Schwesinger, R. Link, P. Wenzl and S. Kossek, *Chem. Eur. J.*, 2005, **12**, 438–445.
- 4 L. H. Finger, J. Guschlbauer, K. Harms and J. Sundermeyer, *Chem. Eur. J.*, 2016, **22**, 16292–16303.
- 5 G. M. Sheldrick, *Acta Cryst. A*, 2015, **71**, 3–8.
- 6 C. B. Hübschle, G. M. Sheldrick and B. Dittrich, *J. Appl. Cryst.*, 2011, **44**, 1281–1284.
- 7 G. M. Sheldrick, *Acta Cryst. C*, 2015, **71**, 3–8.
- 8 A. L. Spek, *Acta Cryst. D*, 2009, **65**, 148–155.
- 9 H. P. K. Brandenburg, *Diamond*, Crystal Impact GbR, Bonn, 2012.
